# Supplementary material for: Ferredoxin 1 is essential for embryonic development and lipid homeostasis
Source: eLife journal article supplement (doi:10.7554/elife.91656), 2024-01-22

**A**

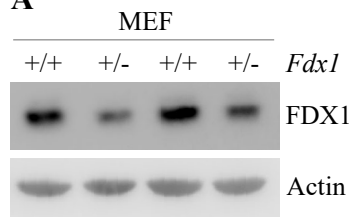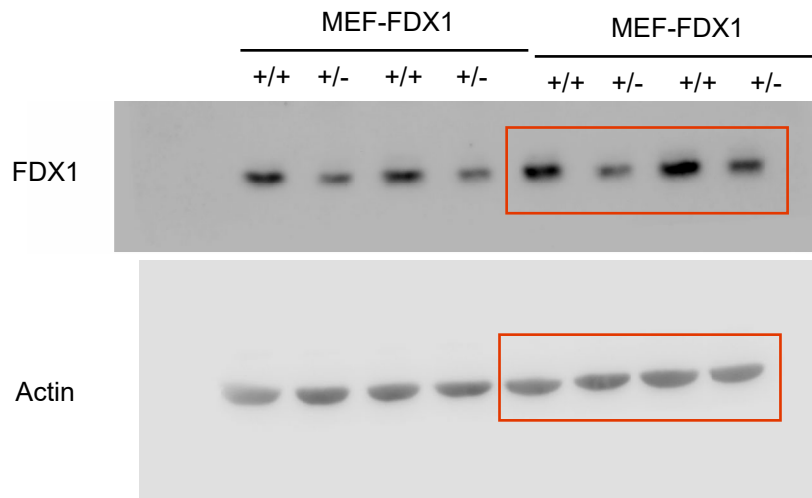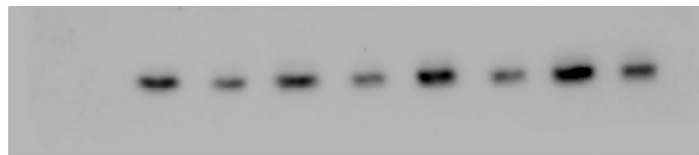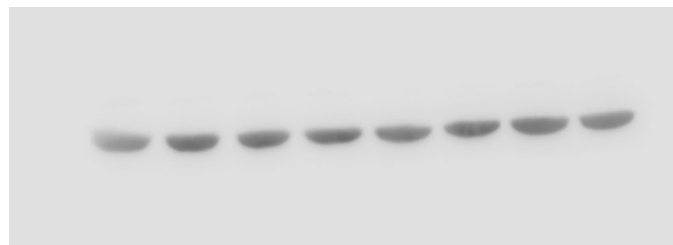

C

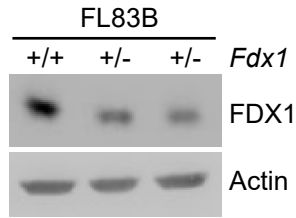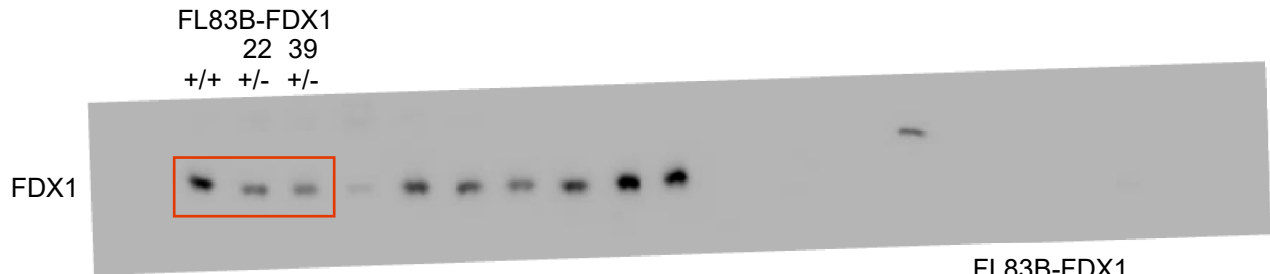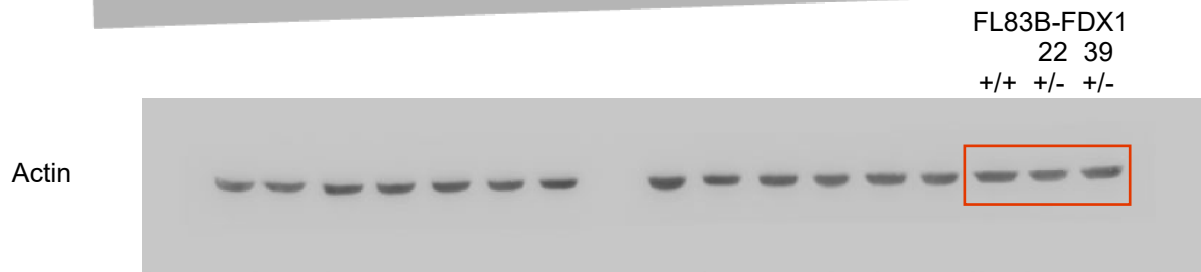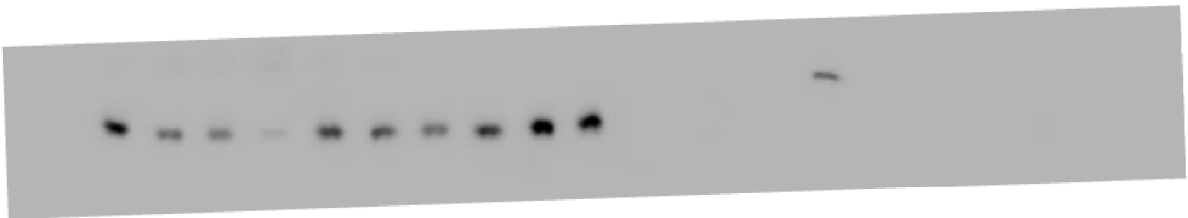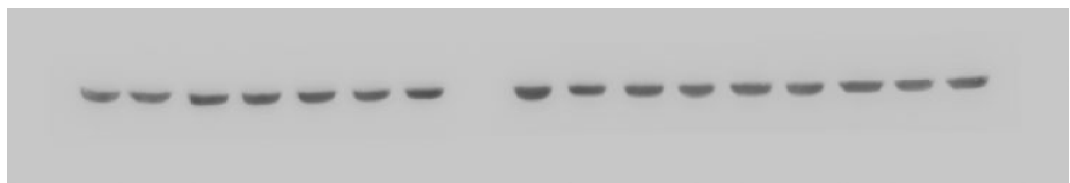

**E** FL83B

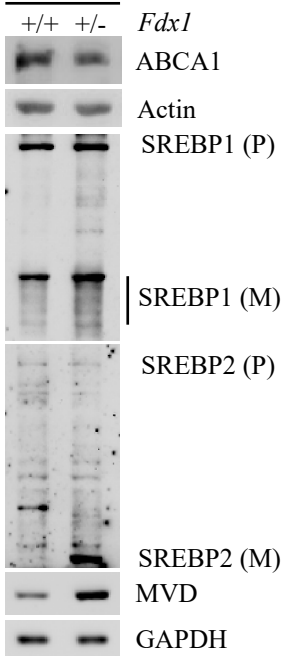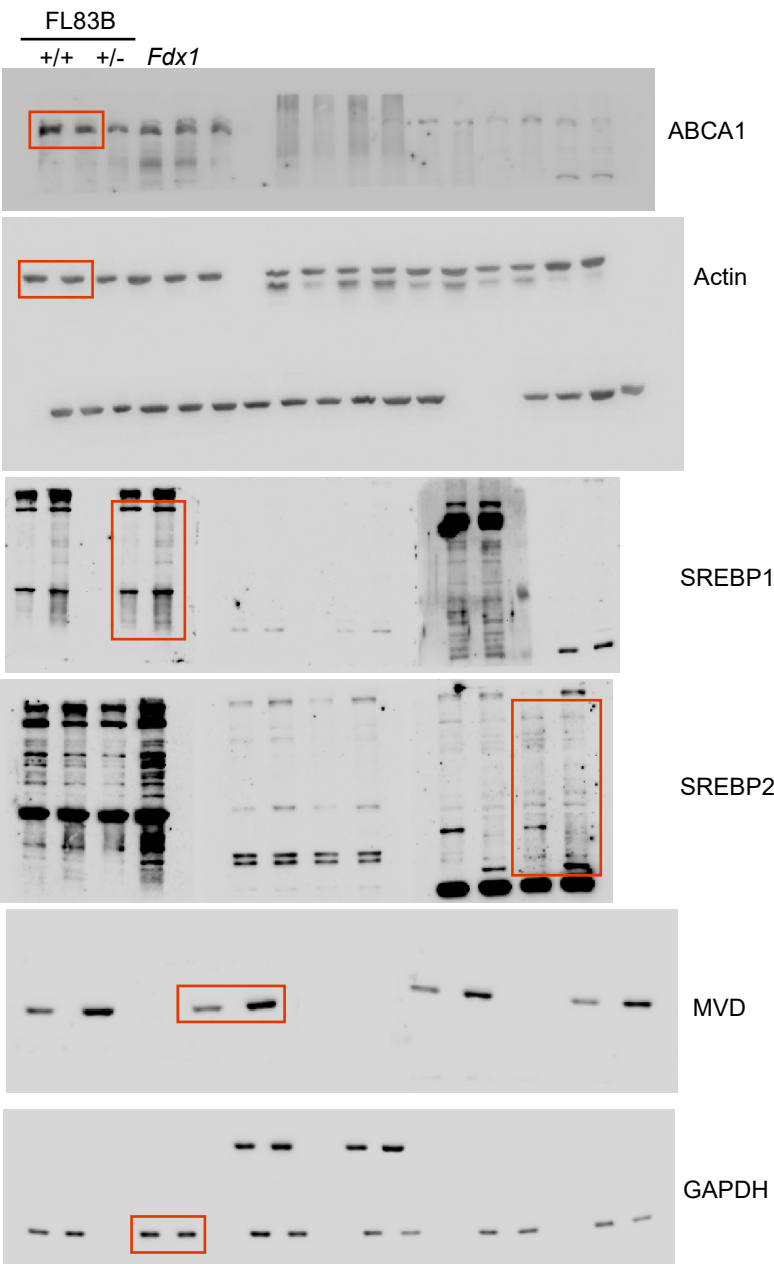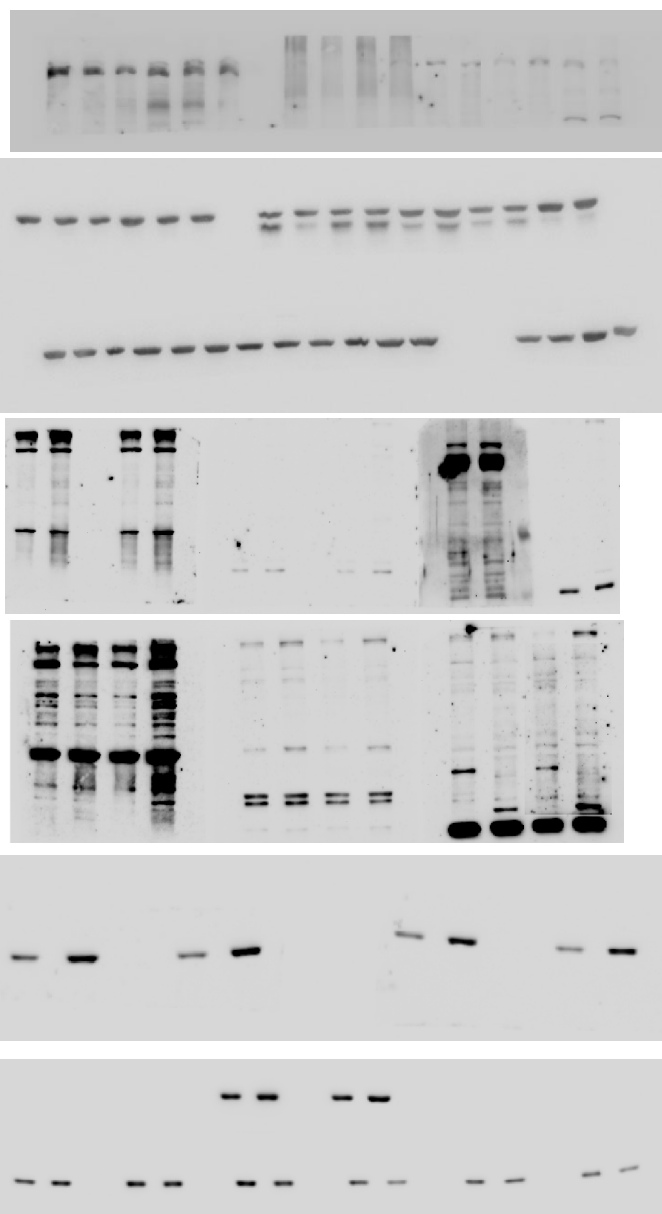

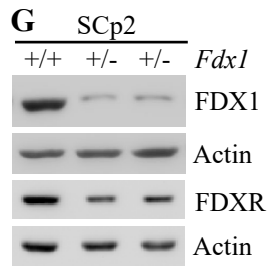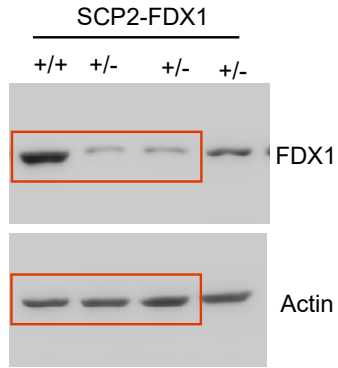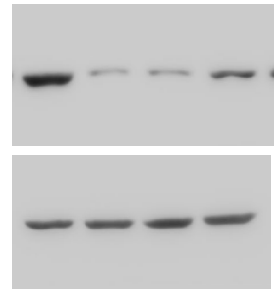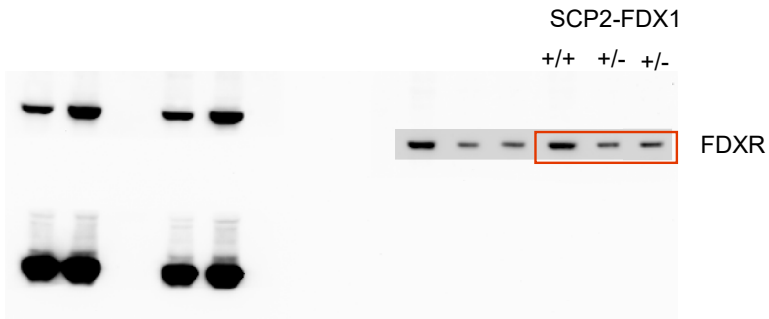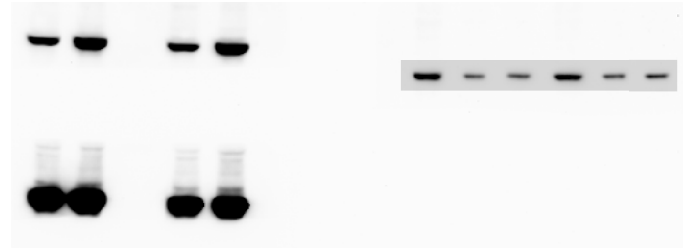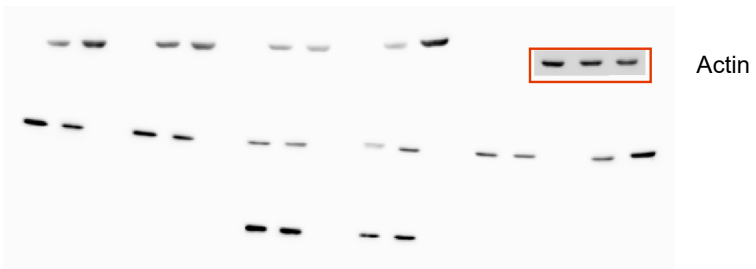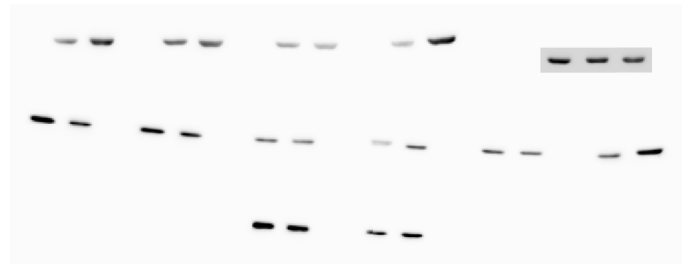

Supplement: supp [file elife-91656-supp-v1.zip]
