# Supplementary material for: Ferredoxin 1 is essential for embryonic development and lipid homeostasis
Source: eLife. 2024 Jan 22;13:e91656. doi: 10.7554/eLife.91656 (PMC10846857; doi:10.7554/eLife.91656)
Supplement: Figure 2—source data 2. [file elife-91656-fig2-data2.xlsx]

## Sheet: Figure 2C
		Mice with lung adenocarcinoma
		WT	Fdxr+/-	Fdx1+/-		The incidences of lung adenocarcinomas are provided in Supplementary Tables S1-S3
		0 of 51	3 of 29	3 of 26
	Percentage	0	10.3	11.54
	p-value		0.0445	0.0355

## Sheet: Figure 2E
		Mice with steatosis/steatohepatitis
		WT	Fdxr+/-	Fdx1+/-		The incidences of steatosis/steatohepatitis are provided in Supplementary Tables S1-S3
		3 of 51	15 of 29	11 of 26
	Percentage	5.88	51.7	42.31
	p-value		<0.0001	0.0002
