# Supplementary material for: Ferredoxin 1 is essential for embryonic development and lipid homeostasis
Source: eLife. 2024 Jan 22;13:e91656. doi: 10.7554/eLife.91656 (PMC10846857; doi:10.7554/eLife.91656)
Supplement: Figure 3—source data 2. [file elife-91656-fig3-data2.xlsx]

## Sheet: Figure 3F
		FL83B-ABCA1-1									FL83B-SREBP1-1									FL83B-SREBP2-1									FL83B-MVD-1
Lane (Sample)	ABCA1	Inverted ABCA1	Background	InvertedBackground	Net ABCA1				Lane (Sample)	SREBP1-mature	Inverted SREBP1-mature	Background	InvertedBackground	Net SREBP1-mature				Lane (Sample)	SREBP2-mature	Inverted SREBP2-mature	Background	InvertedBackground	Net SREBP2-mature				Lane (Sample)	MVD	Inverted MVD	Background	Inverted Background	Net MVD
FL83B-WT	133.846	121.154	182.292	72.708	48.446				FL83B-WT	184.192	70.808	205.138	49.862	20.946				FL83B-WT	183.266	71.734	206.968	48.032	23.702				FL83B-WT	181.751	73.249	210.989	44.011	29.238
FL83B-FDX1-Het	157.044	97.956	180.85	74.15	23.806				FL83B-FDX1-Het	157.592	97.408	204.968	50.032	47.376				FL83B-FDX1-Het	94.298	160.702	203.143	51.857	108.845				FL83B-FDX1-Het	143.836	111.164	210.837	44.163	67.001
Lane (Sample)	Actin/GAPDH	Inverted Actin/GAPDH	Background	InvertedBackground	Net Actin/GAPDH				Lane (Sample)	SREBP1-precursor	Inverted SREBP1-precursor	Background	InvertedBackground	Net SREBP1-precursor				Lane (Sample)	SREBP2-precursor	Inverted SREBP2-precursor	Background	InvertedBackground	Net SREBP2-precursor				Lane (Sample)	GAPDH	Inverted GAPDH	Background	InvertedBackground	Net GAPDH
FL83B-WT	148.72	106.28	204	51	55.28				FL83B-WT	99.269	155.731	203.363	51.637	104.094				FL83B-WT	189.821	65.179	202.575	52.425	12.754				FL83B-WT	158.117	96.883	215	40	56.883
FL83B-FDX1-Het	156.762	98.238	201.653	53.347	44.891				FL83B-FDX1-Het	97.061	157.939	196.83	58.17	99.769				FL83B-FDX1-Het	194.81	60.19	203.198	51.802	8.388				FL83B-FDX1-Het	161.877	93.123	215	40	53.123
Lane (Sample)	Ratio	Normalize to 1							Lane (Sample)	Ratio	Normalize to 1							Lane (Sample)	Ratio	Normalize to 1							Lane (Sample)	Ratio	Normalize to 1
FL83B-WT	0.876375	1							FL83B-WT	0.201222	1							FL83B-WT	1.8584	1							FL83B-WT	0.514002	1
FL83B-FDX1-Het	0.530307	0.605114							FL83B-FDX1-Het	0.474857	2.35987							FL83B-FDX1-Het	12.9763	6.98251							FL83B-FDX1-Het	1.26124	2.45377
		FL83B-ABCA1-2									FL83B-SREBP1-2									FL83B-SREBP2-2									FL83B-MVD-2
Lane (Sample)	ABCA1	Inverted ABCA1	Background	InvertedBackground	Net ABCA1				Lane (Sample)	SREBP1-mature	Inverted SREBP1-mature	Background	InvertedBackground	Net SREBP1-mature				Lane (Sample)	SREBP2-mature	Inverted SREBP2-mature	Background	InvertedBackground	Net SREBP2-mature				Lane (Sample)	MVD	Inverted MVD	Background	Inverted Background	Net MVD
FL83B-WT	129.137	125.863	185.198	69.802	56.061				FL83B-WT	168.012	86.988	200.844	54.156	32.832				FL83B-WT	177.966	77.034	199.888	55.112	21.922				FL83B-WT	186.532	68.468	210.915	44.085	24.383
FL83B-FDX1-Het	153.401	101.599	170.194	84.806	16.793				FL83B-FDX1-Het	139.798	115.202	196.222	58.778	56.424				FL83B-FDX1-Het	71.853	183.147	204.913	50.087	133.06				FL83B-FDX1-Het	141.915	113.085	210.563	44.437	68.648
Lane (Sample)	Actin/GAPDH	Inverted Actin/GAPDH	Background	InvertedBackground	Net Actin/GAPDH				Lane (Sample)	SREBP1-precursor	Inverted SREBP1-precursor	Background	InvertedBackground	Net SREBP1-precursor				Lane (Sample)	SREBP2-precursor	Inverted SREBP2-precursor	Background	InvertedBackground	Net SREBP2-precursor				Lane (Sample)	GAPDH	Inverted GAPDH	Background	InvertedBackground	Net GAPDH
FL83B-WT	151.186	103.814	215	40	63.814				FL83B-WT	114.947	140.053	198.72	56.28	83.773				FL83B-WT	192.663	62.337	203.663	51.337	11				FL83B-WT	173.59	81.41	215	40	41.41
FL83B-FDX1-Het	177.127	77.873	215	40	37.873				FL83B-FDX1-Het	99.929	155.071	191.502	63.498	91.573				FL83B-FDX1-Het	194.817	60.183	208.016	46.984	13.199				FL83B-FDX1-Het	166.37	88.63	215	40	48.63
Lane (Sample)	Ratio	Normalize to 1							Lane (Sample)	Ratio	Normalize to 1							Lane (Sample)	Ratio	Normalize to 1							Lane (Sample)	Ratio	Normalize to 1
FL83B-WT	0.878506	1							FL83B-WT	0.391916	1							FL83B-WT	1.99291	1							FL83B-WT	0.588819	1
FL83B-FDX1-Het	0.443403	0.504724							FL83B-FDX1-Het	0.616164	1.57218							FL83B-FDX1-Het	10.0811	5.05847							FL83B-FDX1-Het	1.41164	2.39741
		FL83B-ABCA1-3									FL83B-SREBP1-3									FL83B-SREBP2-3									FL83B-MVD-3
Lane (Sample)	ABCA1	Inverted ABCA1	Background	InvertedBackground	Net ABCA1				Lane (Sample)	SREBP1-mature	Inverted SREBP1-mature	Background	InvertedBackground	Net SREBP1-mature				Lane (Sample)	SREBP2-mature	Inverted SREBP2-mature	Background	InvertedBackground	Net SREBP2-mature				Lane (Sample)	MVD	Inverted MVD	Background	Inverted Background	Net MVD
FL83B-WT	100.377	154.623	155.383	99.617	55.006				FL83B-WT	176.919	78.081	212.45	42.55	35.531				FL83B-WT	195.568	59.432	209.83	45.17	14.262	1	182.848		FL83B-WT	182.848	72.152	214.7	40.3	31.852
FL83B-FDX1-Het	132.841	122.159	159.185	95.815	26.344				FL83B-FDX1-Het	143.999	111.001	207.107	47.893	63.108				FL83B-FDX1-Het	136.548	118.452	207.403	47.597	70.855	2	129.626		FL83B-FDX1-Het	129.626	125.374	213.254	41.746	83.628
																								3	214.7
Lane (Sample)	Actin/GAPDH	Inverted Actin/GAPDH	Background	InvertedBackground	Net Actin/GAPDH				Lane (Sample)	SREBP1-precursor	Inverted SREBP1-precursor	Background	InvertedBackground	Net SREBP1-precursor				Lane (Sample)	SREBP2-precursor	Inverted SREBP2-precursor	Background	InvertedBackground	Net SREBP2-precursor	4	213.254		Lane (Sample)	GAPDH	Inverted GAPDH	Background	InvertedBackground	Net GAPDH
FL83B-WT	175.677	79.323	215	40	39.323				FL83B-WT	115.668	139.332	211.709	43.291	96.041				FL83B-WT	171.017	83.983	210.446	44.554	39.429	5	180.738		FL83B-WT	180.738	74.262	215	40	34.262
FL83B-FDX1-Het	179.576	75.424	215	40	35.424				FL83B-FDX1-Het	108.729	146.271	206.444	48.556	97.715				FL83B-FDX1-Het	155.071	99.929	208.121	46.879	53.05	6	182.886		FL83B-FDX1-Het	182.886	72.114	215	40	32.114
Lane (Sample)	Ratio	Normalize to 1							Lane (Sample)	Ratio	Normalize to 1							Lane (Sample)	Ratio	Normalize to 1							Lane (Sample)	Ratio	Normalize to 1
FL83B-WT	1.39883	1							FL83B-WT	0.369957	1							FL83B-WT	0.361713	1							FL83B-WT	0.92966	1
FL83B-FDX1-Het	0.743677	0.531644							FL83B-FDX1-Het	0.645837	1.74571							FL83B-FDX1-Het	1.33563	3.6925							FL83B-FDX1-Het	2.6041	2.80113
	FL83B-ABCA1-1	FL83B-ABCA1-2	FL83B-ABCA1-3	Average	SD	SEM	p-value			FL83B-SREBP1-1	FL83B-SREBP1-2	FL83B-SREBP1-3	Average	SD	SEM	p-value			FL83B-SREBP2-1	FL83B-SREBP2-2	FL83B-SREBP2-3	Average	SD	SEM	p-value			FL83B-MVD-1	FL83B-MVD-2	FL83B-MVD-3	Average	SD	SEM	p-value
FL83B-WT	1	1	1	1	0	0			FL83B-WT	1	1	1	1	0	0			FL83B-WT	1	1	1	1	0	0			FL83B-WT	1	1	1	1	0	0
FL83B-FDX1-Het	0.605114	0.504724	0.531644	0.547161	0.0519628	0.0300007	0.000112279		FL83B-FDX1-Het	2.35987	1.57218	1.74571	1.89259	0.413872	0.238949	0.0202006		FL83B-FDX1-Het	6.98251	5.05847	3.6925	5.24449	1.65287	0.954287	0.0112657		FL83B-FDX1-Het	2.45377	2.39741	2.80113	2.55077	0.218643	0.126234	0.000252187
									ABCA1	SREBP1	SREBP2	MVD
							Average	WT	1	1	1	1
								FDX1-Het	0.547161	1.89259	5.24449	2.55077
							SEM	WT	0	0	0	0
								FDX1-Het	0.0300007	0.238949	0.954287	0.126234

## Sheet: Figure 3H
		SCP2-FDXR-1
Lane (Sample)	FDXR	Inverted FDXR	Background	InvertedBackground	Net FDXR
SCP2-WT	175.114	79.886	202.354	52.646	27.24
SCP2-FDX1-Het-1	179.445	75.555	202.762	52.238	23.317
SCP2-FDX1-Het-2	178.545	76.455	202.34	52.66	23.795
Lane (Sample)	Actin	Inverted Actin	Background	InvertedBackground	Net Actin
SCP2-WT	181.962	73.038	208.071	46.929	26.109
SCP2-FDX1-Het-1	183.329	71.671	207.913	47.087	24.584
SCP2-FDX1-Het-2	183.213	71.787	208.348	46.652	25.135
Lane (Sample)	Ratio	Normalize to 1
SCP2-WT	1.04332	1
SCP2-FDX1-Het-1	0.948462	0.909082
SCP2-FDX1-Het-2	0.946688	0.907382
		SCP2-FDXR-2
Lane (Sample)	FDXR	Inverted FDXR	Background	InvertedBackground	Net FDXR
SCP2-WT	139.709	115.291	210.866	44.134	71.157
SCP2-FDX1-Het-1	188.158	66.842	213.143	41.857	24.985
SCP2-FDX1-Het-2	184.441	70.559	213.125	41.875	28.684
Lane (Sample)	Actin	Inverted Actin	Background	InvertedBackground	Net Actin
SCP2-WT	147.523	107.477	218.543	36.457	71.02
SCP2-FDX1-Het-1	158.289	96.711	219.121	35.879	60.832
SCP2-FDX1-Het-2	165.576	89.424	218.272	36.728	52.696
Lane (Sample)	Ratio	Normalize to 1
SCP2-WT	1.00193	1
SCP2-FDX1-Het-1	0.410721	0.409931
SCP2-FDX1-Het-2	0.54433	0.543282
		SCP2-FDXR-3
Lane (Sample)	FDXR	Inverted FDXR	Background	InvertedBackground	Net FDXR
SCP2-WT	145.617	109.383	212.04	42.96	66.423
SCP2-FDX1-Het-1	187.041	67.959	213.821	41.179	26.78
SCP2-FDX1-Het-2	182.48	72.52	213.714	41.286	31.234
Lane (Sample)	Actin	Inverted Actin	Background	InvertedBackground	Net Actin
SCP2-WT	147.523	107.477	218.543	36.457	71.02
SCP2-FDX1-Het-1	158.289	96.711	219.121	35.879	60.832
SCP2-FDX1-Het-2	165.576	89.424	218.272	36.728	52.696
Lane (Sample)	Ratio	Normalize to 1
SCP2-WT	0.935272	1
SCP2-FDX1-Het-1	0.440229	0.470696
SCP2-FDX1-Het-2	0.592721	0.633741
	SCP2-FDXR-1	SCP2-FDXR-2	SCP2-FDXR-3	Average	SD	SEM	p-value
SCP2-WT	1	1	1	1	0	0
SCP2-FDX1-Het-1	0.909082	0.409931	0.470696	0.59657	0.272344	0.157238	0.0622592
SCP2-FDX1-Het-2	0.907382	0.543282	0.633741	0.694802	0.189574	0.109451	0.04939
					FDXR
			Average	SCP2-WT	1
				SCP2-FDX1-Het-1	0.59657
				SCP2-FDX1-Het-2	0.694802
			SEM	SCP2-WT	0
				SCP2-FDX1-Het-1	0.157238
				SCP2-FDX1-Het-2	0.109451
