# Supplementary material for: Ferredoxin 1 is essential for embryonic development and lipid homeostasis
Source: eLife. 2024 Jan 22;13:e91656. doi: 10.7554/eLife.91656 (PMC10846857; doi:10.7554/eLife.91656)
Supplement: Figure 4—source data 2. [file elife-91656-fig4-data2.xlsx]

## Sheet: Figure 4C
		HCT116-SREBP1-1									HCT116-SREBP2-1									HCT116-MVD-1
Lane (Sample)	SREBP1-mature	Inverted SREBP1-mature	Background	InvertedBackground	Net SREBP1-mature				Lane (Sample)	SREBP2-mature	Inverted SREBP2-mature	Background	InvertedBackground	Net SREBP2-mature				Lane (Sample)	MVD	Inverted MVD	Background	Inverted Background	Net MVD
HCT116-WT#2	145.809	109.191	211.01	43.99	65.201				HCT116-WT#2	139.287	115.713	211.927	43.073	72.64				HCT116-WT#2	158.731	96.269	212.835	42.165	54.104
HCT116-FDX1-KO#18	124.144	130.856	213.097	41.903	88.953				HCT116-FDX1-KO#18	99.271	155.729	213.253	41.747	113.982				HCT116-FDX1-KO#18	139.133	115.867	212.575	42.425	73.442
Lane (Sample)	SREBP1-precursor	Inverted SREBP1-precursor	Background	InvertedBackground	Net SREBP1-precursor				Lane (Sample)	SREBP2-precursor	Inverted SREBP2-precursor	Background	InvertedBackground	Net SREBP2-precursor				Lane (Sample)	GAPDH	Inverted GAPDH	Background	InvertedBackground	Net GAPDH
HCT116-WT#2	182.603	72.397	211.766	43.234	29.163				HCT116-WT#2	191.858	63.142	213.436	41.564	21.578				HCT116-WT#2	128.256	126.744	215	40	86.744
HCT116-FDX1-KO#18	180.426	74.574	210.611	44.389	30.185				HCT116-FDX1-KO#18	196.996	58.004	213.738	41.262	16.742				HCT116-FDX1-KO#18	126.372	128.628	214.98	40.02	88.608
Lane (Sample)	Ratio	Normalize to 1							Lane (Sample)	Ratio	Normalize to 1							Lane (Sample)	Ratio	Normalize to 1
HCT116-WT#2	2.23574	1							HCT116-WT#2	3.36639	1							HCT116-WT#2	0.62372	1
HCT116-FDX1-KO#18	2.94693	1.3181							HCT116-FDX1-KO#18	6.80815	2.02239							HCT116-FDX1-KO#18	0.828842	1.32887
		HCT116-SREBP1-2									HCT116-SREBP2-2									HCT116-MVD-2
Lane (Sample)	SREBP1-mature	Inverted SREBP1-mature	Background	InvertedBackground	Net SREBP1-mature				Lane (Sample)	SREBP2-mature	Inverted SREBP2-mature	Background	InvertedBackground	Net SREBP2-mature				Lane (Sample)	MVD	Inverted MVD	Background	Inverted Background	Net MVD
HCT116-WT#2	177.416	77.584	201.698	53.302	24.282				HCT116-WT#2	141.844	113.156	212.139	42.861	70.295				HCT116-WT#2	173.094	81.906	208.86	46.14	35.766
HCT116-FDX1-KO#18	148.136	106.864	195.202	59.798	47.066				HCT116-FDX1-KO#18	106.172	148.828	211.321	43.679	105.149				HCT116-FDX1-KO#18	157.21	97.79	208.817	46.183	51.607
Lane (Sample)	SREBP1-precursor	Inverted SREBP1-precursor	Background	InvertedBackground	Net SREBP1-precursor				Lane (Sample)	SREBP2-precursor	Inverted SREBP2-precursor	Background	InvertedBackground	Net SREBP2-precursor				Lane (Sample)	GAPDH	Inverted GAPDH	Background	InvertedBackground	Net GAPDH
HCT116-WT#2	119.323	135.677	192.069	62.931	72.746				HCT116-WT#2	206.189	48.811	212.056	42.944	5.867				HCT116-WT#2	146.201	108.799	215	40	68.799
HCT116-FDX1-KO#18	114.087	140.913	194.69	60.31	80.603				HCT116-FDX1-KO#18	203.942	51.058	210.846	44.154	6.904				HCT116-FDX1-KO#18	137.603	117.397	215	40	77.397
Lane (Sample)	Ratio	Normalize to 1							Lane (Sample)	Ratio	Normalize to 1							Lane (Sample)	Ratio	Normalize to 1
HCT116-WT#2	0.333792	1							HCT116-WT#2	11.9814	1							HCT116-WT#2	0.519862	1
HCT116-FDX1-KO#18	0.583924	1.74937							HCT116-FDX1-KO#18	15.2302	1.27115							HCT116-FDX1-KO#18	0.666783	1.28261
		HCT116-SREBP1-3									HCT116-SREBP2-3									HCT116-MVD-3
Lane (Sample)	SREBP1-mature	Inverted SREBP1-mature	Background	InvertedBackground	Net SREBP1-mature				Lane (Sample)	SREBP2-mature	Inverted SREBP2-mature	Background	InvertedBackground	Net SREBP2-mature				Lane (Sample)	MVD	Inverted MVD	Background	Inverted Background	Net MVD
HCT116-WT#2	180.42	74.58	200.653	54.347	20.233				HCT116-WT#2	139.401	115.599	211.699	43.301	72.298				HCT116-WT#2	174.125	80.875	209.45	45.55	35.325
HCT116-FDX1-KO#18	149.968	105.032	194.56	60.44	44.592				HCT116-FDX1-KO#18	108.112	146.888	211.126	43.874	103.014				HCT116-FDX1-KO#18	158.602	96.398	207.363	47.637	48.761
Lane (Sample)	SREBP1-precursor	Inverted SREBP1-precursor	Background	InvertedBackground	Net SREBP1-precursor				Lane (Sample)	SREBP2-precursor	Inverted SREBP2-precursor	Background	InvertedBackground	Net SREBP2-precursor				Lane (Sample)	GAPDH	Inverted GAPDH	Background	InvertedBackground	Net GAPDH
HCT116-WT#2	102.725	152.275	192.333	62.667	89.608				HCT116-WT#2	205.126	49.874	210.93	44.07	5.804				HCT116-WT#2	156.5	98.5	215	40	58.5
HCT116-FDX1-KO#18	97.214	157.786	192.253	62.747	95.039				HCT116-FDX1-KO#18	203.273	51.727	208.105	46.895	4.832				HCT116-FDX1-KO#18	157.529	97.471	215	40	57.471
Lane (Sample)	Ratio	Normalize to 1							Lane (Sample)	Ratio	Normalize to 1							Lane (Sample)	Ratio	Normalize to 1
HCT116-WT#2	0.225795	1							HCT116-WT#2	12.4566	1							HCT116-WT#2	0.603846	1
HCT116-FDX1-KO#18	0.469197	2.07798							HCT116-FDX1-KO#18	21.3191	1.71147							HCT116-FDX1-KO#18	0.848445	1.40507
	HCT116-SREBP1-1	HCT116-SREBP1-2	HCT116-SREBP1-3	Average	SD	SEM	p-value			HCT116-SREBP2-1	HCT116-SREBP2-2	HCT116-SREBP2-3	Average	SD	SEM	p-value			HCT116-MVD-1	HCT116-MVD-2	HCT116-MVD-3	Average	SD	SEM	p-value
HCT116-WT#2	1	1	1	1	0	0			HCT116-WT#2	1	1	1	1	0	0			HCT116-WT#2	1	1	1	1	0	0
HCT116-FDX1-KO#18	1.3181	1.74937	2.07798	1.71515	0.381096	0.220026	0.0313671		HCT116-FDX1-KO#18	2.02239	1.27115	1.71147	1.66834	0.377473	0.217934	0.0374135		HCT116-FDX1-KO#18	1.32887	1.28261	1.40507	1.33885	0.0618343	0.0357001	0.000687578
										SREBP1	SREBP2	MVD
								Average	WT#2	1	1	1
									FDX1-KO#18	1.71515	1.66834	1.33885
								SEM	WT#2	0	0	0
									FDX1-KO#18	0.220026	0.217934	0.0357001
