# Supplementary material for: Ferredoxin 1 is essential for embryonic development and lipid homeostasis
Source: eLife. 2024 Jan 22;13:e91656. doi: 10.7554/eLife.91656 (PMC10846857; doi:10.7554/eLife.91656)
Supplement: Figure 4—source data 3. [file elife-91656-fig4-data3.xlsx]

## Sheet: Figure 4D
	sample-background			40*2*			avg	std
HCT116-FDX1+/+	56.088	66.261	75.59	72.896	86.1176	98.2422	85.7519	12.6771
HCT116-FDX1-/-	87.848	87.243	87.074	113.387	113.168	114.174	113.576	0.528905
			p-value
	MEAN	STDV	VS HCT+/+
HCT116-FDX1+/+	85.7519	12.6771
HCT116-FDX1-/-	113.576	0.528905	0.0191318

## Sheet: Figure 4E
									p-value
	NO			LIPASE			MEAN	STDEV	VS HCT+/+
HCT116 FDX1+/+	15.001	15.0805	10.0492	75.3186	71.5625	63.9517
				60.3176	56.482	53.9025	56.9007	3.22798
HCT116 FDX1-/-	24.83	17.5909	22.8759	123.131	120.112	107.515
				98.3006	102.521	84.639	95.1536	9.34725	0.00258199
										HCT116+/+	FDX1-/-
									MEAN	56.9007	95.1536
									STDEV	3.22798	9.34725
