# Supplementary material for: Ferredoxin 1 is essential for embryonic development and lipid homeostasis
Source: eLife. 2024 Jan 22;13:e91656. doi: 10.7554/eLife.91656 (PMC10846857; doi:10.7554/eLife.91656)
Supplement: Figure 5—source data 1. [file elife-91656-fig5-data1.xlsx]

## Sheet: Figures 5A and 5I
	HCT116	Cholesterol	CL 64:2|CL 30:0_34:2	CL 66:1|CL 16:0_16:0_16:0_18:1	CL 66:1|CL 32:0_34:1	CL 66:2|CL 14:0_18:1_16:0_18:1	CL 66:2|CL 32:1_34:1	CL 66:3|CL 32:1_34:2	CL 66:3|CL 32:1_34:2	CL 66:4|CL 32:2_34:2	CL 66:4|CL 32:2_34:2	CL 68:1|CL 34:0_34:1	CL 68:2|CL 34:1_34:1	CL 68:2|CL 34:1_34:1	CL 68:3|CL 34:1_34:2	CL 68:3|CL 34:1_34:2	CL 68:4|CL 34:2_34:2	CL 68:4|CL 34:2_34:2	CL 68:5|CL 16:1_16:1_18:1_18:2	CL 68:5|CL 34:1_34:4	CL 68:5|CL 34:2_34:3	CL 68:6|CL 32:1_36:5	CL 70:2|CL 34:1_36:1	CL 70:2|CL 34:1_36:1	CL 70:3|CL 34:1_36:2	CL 70:3|CL 34:1_36:2	CL 70:4|CL 34:2_36:2	CL 70:4|CL 34:2_36:2	CL 70:5|CL 16:1_18:1_18:1_18:2	CL 70:5|CL 34:2_36:3	CL 70:6|CL 34:3_26:3	CL 70:6|CL 34:3_36:3	CL 70:7|CL 34:2_36:5	CL 70:7|CL 34:3_36:4	CL 70:8|CL 16:1_18:2_18:2_18:3	CL 72:4|CL 18:1_18:1_18:1_18:1	CL 72:4|CL 36:1_36:3	CL 72:5|CL 18:1_18:1_18:1_18:2	CL 72:5|CL 36:2_36:3	CL 72:6|CL 36:3_36:3	CL 72:6|CL 36:3_36:3	CL 72:7|CL 18:1_18:2_18:2_18:2	CL 72:7|CL 36:3_36:4	CL 74:6|CL 36:1_38:5	CL 74:7|CL 36:3_38:4	CL 74:8|CL 18:1_18:2_18:2_20:3
s_1	Ctrl	85436.8	20159.9	74668.2	3002.32	73286.4	2609.12	210973	5067.18	487955	6284.55	17328.6	309467	15243.8	273277	10333.2	1.27628e+06	43324.3	848162	16805.5	12250.3	128237	25293.7	927.466	105960	5997.98	493641	22087	1.43559e+06	59482.2	506958	8150.59	144542	64416.1	125309	53339.8	3491.05	272657	10050	487798	15592.5	150142	2543.59	12791.3	31659.3	25160.4
s_2	Ctrl	81878.5	21772.9	76896.5	2935.47	77586.9	2558.49	219960	5404.74	546426	7333.09	17574.9	328567	14783.3	290763	10879.7	1.3366e+06	51207.8	926985	17389.7	14251.3	144150	25058.5	1234.64	105217	6107.37	523159	23917.6	1.55044e+06	70443.4	550153	9123.14	142363	73411.2	129274	53683.8	3499.81	293900	10517.3	535632	17366.3	160033	2828.4	13728.2	34633.4	28371
s_3	Ctrl	76512.9	23019.7	85287	3056.41	82557.7	2994.87	229754	6495.01	563293	8266.67	19053.2	368486	18271.5	317024	13429.4	1.40335e+06	63141.8	969917	18267.2	16172.8	143072	26298.5	1271.8	115842	7097.44	567270	30243.5	1.63061e+06	85317.2	566255	10623.5	141179	73115.3	127381	60782.8	4120.92	319134	12856.2	558567	22239.2	176529	3100.68	14795.2	38754.2	29801.9
s_4	FDX1-/-	96172.3	30995.3	179097	6820.48	135574	3853.23	174885	3682.47	262581	3400.34	28618.3	596229	30307.4	330826	10715.8	760024	22358.4	633680	30092	8552.83	135608	31247.8	1325.24	142422	8156.86	470678	18739	1.37512e+06	47461.3	627295	9829.81	118450	101906	118062	56095.8	4049.97	345245	11356.7	788610	24484.2	266469	4026.46	22938.7	48023	45355.2
s_5	FDX1-/-	94494	31360.2	184500	7176.06	138329	4415.85	175513	4119.94	264513	3686.27	28202.3	603649	31351.8	334607	11703.3	770503	24133.8	645428	29801.6	9216.26	137834	32577.4	1818.57	147845	8360.89	479639	20173.2	1.40069e+06	53516.2	641031	10299.3	115993	104903	114229	59084.5	4484.14	356774	12846.2	759113	24914.9	270325	4299.65	23613.9	46197.5	43003.6
s_6	FDX1-/-	89703.6	34073.4	184646	6413.72	144072	3776.75	184146	3520.62	273155	2986.24	30083.6	599617	28816.9	346846	10128.8	779776	21751.2	663096	29295.4	7955.15	136868	33550.7	1305.1	145281	7609.38	494101	18143.3	1.43816e+06	47479.4	651091	9345.24	112405	106111	114243	59429.1	4008.43	362161	11389.6	779274	23466.1	278556	3866.39	23499.9	50627.5	45957.8
		Cholesterol					Cardiolipins
Ctrl	Average	81276.1			Total TAGs	s_1	Ctrl	7.89829e+06
	SD	4492.36				s_2	Ctrl	8.47813e+06
	SEM	2593.66				s_3	Ctrl	8.97809e+06
						Ctrl	Average	8.4515e+06
							SD	540390
FDX1-/-	Average	93456.6					SEM	311994
	SD	3356.81
	SEM	1938.05			Total TAGs	s_4	FDX1-/-	8.07525e+06
						s_5	FDX1-/-	8.17577e+06
	p-value	0.0197404				s_6	FDX1-/-	8.31208e+06
						FDX1-/-	Average	8.1877e+06
							SD	118864
							SEM	68626.2
							p-value	0.455327

## Sheet: Figure 5B
	HCT116	TG 40:0	TG 42:0	TG 42:1	TG 44:0	TG 44:1	TG 44:2	TG 45:0|TG 14:0_15:0_16:0	TG 45:1|TG 14:0_15:0_16:1	TG 46:0	TG 46:1	TG 46:2	TG 46:3 Isomer A	TG 47:0|TG 14:0_16:0_17:0	TG 47:1|TG 14:0_15:0_18:1	TG 47:2|TG 14:0_16:1_17:1	TG 48:0	TG 48:1	TG 48:2	TG 48:3	TG 48:4 Isomer A	TG 49:0	TG 49:1	TG 49:2	TG 49:3	TG 50:1	TG 50:2	TG 50:3 Isomer A	TG 50:3 Isomer B	TG 50:4	TG 50:4|TG 16:0_18:1_16:3	TG 50:5	TG 51:1	TG 51:2	TG 51:3	TG 51:4	TG 51:5	TG 52:0	TG 52:1	TG 52:1|TG 16:0_18:0_18:1	TG 52:2	TG 52:3	TG 52:4	TG 52:5 Isomer A	TG 52:5 Isomer B	TG 52:6	TG 52:6|TG 16:0_16:2_20:4	TG 53:0	TG 53:1
s_1	Ctrl	1546.15	7476.37	7002.09	44400.6	41860.4	8597.11	3879.81	6577.79	175733	341738	65597.9	3376.64	10765.3	31933.7	12087	244793	1.40398e+06	648045	21495	1455.07	13982	118943	90414	10251	2.15457e+06	913229	468112	11897.1	16050.2	8946.99	4512.93	127128	336761	70416.3	2947.9	1060.75	182.161	1.3288e+06	6517.81	4.89352e+06	2.0223e+06	111565	10376.5	593.134	4678.43	10694.2	6666.65	58816.9
s_2	Ctrl	1507.88	8111.57	7299.63	43776.6	42971.3	10114.6	3771.94	6614.84	167840	340629	72619.3	3668.22	9829.13	31420.2	13178.4	237484	1.33647e+06	657645	21924.5	1717.56	12933	108329	90532.1	11340.4	2.01047e+06	774948	485837	11357.1	16920.2	8050.22	4874.97	116171	318165	71769.5	3142.91	1143.18	189.601	1.246e+06	5801.78	4.64326e+06	2.01722e+06	114568	11632.6	539.804	4731.1	10328.8	6310.36	52972.2
s_3	Ctrl	1915.25	9310.67	8166.27	55237.8	51467.8	10813.5	4918.76	8033.48	193423	428642	87132.1	4481.52	12552.8	40279.7	16028.1	236361	1.59934e+06	824482	26607.3	1799.73	14293.1	144185	117666	13519	2.34892e+06	805024	613484	15150.4	21182.2	10766	5977.87	154429	405990	94826.5	3557.36	1340.89	61.5385	1.54533e+06	7843.46	5.37426e+06	2.43073e+06	147528	10445.4	624.022	5476.93	13433.8	5997.09	71257.3
s_4	FDX1-/-	1706.36	9373.22	4333.33	54313.9	31668.5	4634.02	3876.74	5152.48	229675	258130	34526.8	1968.68	11001.6	21868.4	6534.65	374305	1.18969e+06	330229	13520.9	1301.73	15604.7	87582.3	47028.2	4596.9	2.1637e+06	517006	205348	10038.9	9969.64	11457	6261.18	108116	204461	33880.9	1880.83	941.652	348.943	1.26805e+06	9291.55	3.70204e+06	1.1351e+06	77512.5	8417.95	684.276	3882.92	10760.3	8236.06	52832.8
s_5	FDX1-/-	2143.23	10203.4	4654.26	56175.7	32348.6	4871.09	3952.22	5254.46	229629	267935	36376.3	2316.94	10681.4	23316.8	6571.07	373449	1.1979e+06	345752	14692.4	1445.99	16312.1	91782.9	49413	4855.52	2.16882e+06	510786	216311	10674.2	10717.4	11601.5	6675.29	110374	214262	36046.8	2124.07	1108.16	255.175	1.27279e+06	10029.7	3.73658e+06	1.17717e+06	82897.3	8939.52	624.161	4323.61	11267.3	8783.78	53147.2
s_6	FDX1-/-	1543.76	9023.91	4193.54	50826.6	31258.3	4365.85	3748.81	5099.31	218527	246007	32970.9	2069.99	10404.7	21339.1	6860.78	358012	1.12318e+06	314304	12917.1	1160.73	15413.2	85170.1	44359.3	4821.06	2.04282e+06	466809	199815	10162.5	9397.63	11212.7	6199.5	104034	192706	31749.6	1888.37	944.187	294.549	1.19957e+06	9267.24	3.47403e+06	1.08918e+06	76106.6	7922.55	626.353	3717.37	10443.1	7993.57	49856.8
					TAGs
		Total TAGs	s_1	Ctrl	3.33594e+07
			s_2	Ctrl	3.16287e+07
			s_3	Ctrl	3.88346e+07
			Ctrl	Average	3.46076e+07
				SD	3.76161e+06
				SEM	2.17176e+06
		Total TAGs	s_4	FDX1-/-	2.49291e+07
			s_5	FDX1-/-	2.5487e+07
			s_6	FDX1-/-	2.37269e+07
			FDX1-/-	Average	2.47143e+07
				SD	899506
				SEM	519330
				p-value	0.0114178
[truncated: 120 more columns]

## Sheet: Figure 5C
	HCT116	CAR 12:0	CAR 12:1	CAR 14:1	CAR 14:2	CAR 16:0	CAR 18:0	CAR 18:1	CAR 18:2
s_1	Ctrl	1362.87	613.127	3140.05	273.241	58525.9	10728.6	30354.2	1776.07
s_2	Ctrl	1348.4	476.232	2084.49	185.14	63792.8	12640.8	32089.4	2200.48
s_3	Ctrl	1361.4	397.301	1163.83	211.606	65700.5	13467.2	25511.5	1195.14
s_4	FDX1-/-	2227.3	382.353	1671.71	146.012	150317	42052.6	67448.8	4744.15
s_5	FDX1-/-	2216.31	404.926	1035.08	165.325	132656	39407.2	55657	3998.95
s_6	FDX1-/-	1967.54	285.235	746.269	97.7949	123140	36547.4	53862.9	3889.68
				CARs
	Total TAGs	s_1	Ctrl	106774
		s_2	Ctrl	114818
		s_3	Ctrl	109008
		Ctrl	Average	110200
			SD	4152.13
			SEM	2397.23
	Total TAGs	s_4	FDX1-/-	268990
		s_5	FDX1-/-	235541
		s_6	FDX1-/-	220537
		FDX1-/-	Average	241689
			SD	24804.5
			SEM	14320.9
			p-value	0.000824082

## Sheet: Figure 5D
	HCT116	PC 28:0	PC 30:0	PC 30:1	PC 31:0	PC 31:1	PC 31:4	PC 32:0	PC 32:0	PC 32:1	PC 32:1	PC 32:2	PC 32:2	PC 32:2|PC 16:0_16:2	PC 33:0	PC 33:1	PC 33:1	PC 33:2	PC 33:2	PC 34:0	PC 34:0	PC 34:1	PC 34:1	PC 34:2	PC 34:2	PC 34:3	PC 34:3 Isomer A	PC 34:3 Isomer B	PC 34:3 Isomer C	PC 34:4	PC 34:4	PC 34:4|PC 14:0_20:4	PC 34:5|PC 14:1_20:4	PC 35:1	PC 35:1	PC 35:2	PC 35:2 Isomer A	PC 35:2 Isomer B	PC 35:3	PC 35:4	PC 35:4	PC 35:6|PC 15:1_20:5	PC 36:1	PC 36:1	PC 36:2	PC 36:2	PC 36:2|PC 18:1_18:1	PC 36:3 Isomer A	PC 36:3 Isomer A
s_1	Ctrl	316399	9.42117e+06	33855.3	549733	250540	7795.15	1.71986e+06	6.8309e+06	3.09885e+06	1.15146e+07	429843	1.48386e+06	123608	188835	758708	1.9562e+06	284995	270280	271612	593594	7.36515e+06	1.33579e+07	1.79281e+06	6.64001e+06	77289.5	6803.27	223588	96747.4	44872.7	95782.2	17682.9	27555.2	184381	538898	321824	1.03043e+06	273336	148331	23720.9	16696.6	36387.8	1.36065e+06	4.35304e+06	2.62621e+06	2.81232e+06	9.04993e+06	640468	3.12443e+06
s_2	Ctrl	346666	9.69181e+06	34882.1	585697	271150	7052.03	1.72519e+06	7.05548e+06	3.26899e+06	1.17907e+07	440759	1.57184e+06	128111	198306	769056	2.13489e+06	301262	295954	287765	640573	7.55091e+06	1.34388e+07	1.83727e+06	6.85721e+06	88607.1	8669.21	256249	102755	47299.8	103805	18343.3	28502.6	187572	586528	326975	1.08683e+06	315019	153765	21641.3	17760	42736	1.45211e+06	4.57114e+06	2.7204e+06	2.8841e+06	9.31917e+06	644264	3.34917e+06
s_3	Ctrl	355674	9.52603e+06	35955.8	580505	275496	7337.12	1.69661e+06	7.00787e+06	3.11689e+06	1.15458e+07	414617	1.58131e+06	129564	202929	772655	2.11839e+06	281485	298592	282825	642902	7.36364e+06	1.30987e+07	1.79975e+06	6.82987e+06	83224.9	8262.36	257968	101544	43902.9	104698	19071.5	28624	183963	582798	317664	1.09806e+06	316862	153213	25011.6	19127.7	43486.1	1.41858e+06	4.55498e+06	2.69509e+06	2.87856e+06	9.17683e+06	636719	3.33072e+06
s_4	FDX1-/-	466050	1.16562e+07	31581.9	643281	209032	4557.3	2.34617e+06	9.29452e+06	2.70602e+06	1.20509e+07	320966	1.05876e+06	162329	202379	627978	1.84071e+06	230527	226154	364598	843779	6.77396e+06	1.45632e+07	1.42024e+06	7.32273e+06	88967	8083.86	249835	110927	54473.5	101890	24831.9	26845.1	167367	538467	290102	964597	288112	177108	26736.2	16901.5	29691.1	1.1236e+06	3.52545e+06	2.41001e+06	2.76692e+06	9.25083e+06	785775	3.96758e+06
s_5	FDX1-/-	478090	1.14537e+07	31575.9	651418	216758	4400.28	2.25388e+06	9.33969e+06	2.70247e+06	1.18473e+07	313546	1.08251e+06	168441	209300	613063	1.86384e+06	221037	234734	376713	861724	6.6299e+06	1.4224e+07	1.41057e+06	7.40792e+06	88326.6	8103.32	244483	115217	54960.9	105169	26957.5	25572.6	163975	546334	282770	970415	264686	184423	30308.4	16470.2	29994.5	1.14138e+06	3.60024e+06	2.36429e+06	2.80533e+06	9.24099e+06	773764	4.03097e+06
s_6	FDX1-/-	438784	1.09891e+07	30685.5	611959	202288	4779.15	2.32346e+06	8.84717e+06	2.8032e+06	1.13377e+07	318908	999733	152204	193861	644909	1.74403e+06	231765	219523	383747	802049	6.89698e+06	1.37055e+07	1.45362e+06	6.99033e+06	85097.9	8135.61	242351	106766	54925.8	98590.1	23821.2	24820.1	168331	512421	290996	915077	249411	169379	31444.6	15704.2	29737.8	1.18855e+06	3.31073e+06	2.46654e+06	2.46887e+06	8.72778e+06	800799	3.77414e+06
				PC
	Total TAGs	s_1	Ctrl	1.22297e+08
		s_2	Ctrl	1.26936e+08
		s_3	Ctrl	1.25371e+08
		Ctrl	Average	1.24868e+08
			SD	2.36015e+06
			SEM	1.36264e+06
	Total TAGs	s_4	FDX1-/-	1.37442e+08
		s_5	FDX1-/-	1.37149e+08
		s_6	FDX1-/-	1.32031e+08
		FDX1-/-	Average	1.35541e+08
			SD	3.04301e+06
			SEM	1.75688e+06
			p-value	0.00864652
[truncated: 141 more columns]

## Sheet: Figure 5E
	HCT116	LPC 14:0	LPC 14:0	LPC 15:0	LPC 16:0	LPC 16:0	LPC 16:1	LPC 16:1	LPC 17:1	LPC 18:0	LPC 18:0 Isomer A	LPC 18:0 Isomer B	LPC 18:1	LPC 18:1	LPC 18:2	LPC 18:2	LPC 20:0	LPC 20:1	LPC 20:1	LPC 20:2	LPC 20:3	LPC 20:3	LPC 20:4	LPC 22:5	LPC 22:5	LPC 22:6	LPC 26:0/0:0	LPC 26:1/0:0	LPC O-16:0	LPC O-20:1	LPC P-16:0 or LPC O-16:1	LPC P-18:0 or LPC O-18:1
s_1	Ctrl	5608.11	2931.24	507.607	170565	60692.9	13310	5029.42	810.838	13068.9	945.237	52787.8	76313.2	24227.4	3627.67	1301.78	690.879	10311	2510.27	530.932	976.338	298.788	850.825	1006.33	306.564	751.969	7033.19	2211.48	3645.44	2613.56	5072.74	1767.18
s_2	Ctrl	4690.95	3090.49	635.72	154391	54113.2	11943.7	4828.13	647.988	11914.7	1078.49	50169.5	64544.6	19934.8	3071.53	1197.83	858.78	7943.16	2081.15	504.115	1050.61	354.665	697.062	453.926	336.82	602.261	7775.86	2266.29	3441.81	2690.1	4563.8	1483.35
s_3	Ctrl	5210.26	2964.65	526.856	153651	52151.2	11756	4522.54	541.971	11820.8	797.841	50320.2	63585.5	18648.3	2629.96	1135.76	753.577	7766.81	1810.53	285.02	1117.41	364.913	775.169	932.794	247.234	648.853	7577.87	2437.79	3228.07	2434.55	4259.11	1374.36
s_4	FDX1-/-	3262.99	1889.49	362.555	104760	34450.1	6358.94	2676.47	441.748	9665.24	1680.37	40415.6	43767.7	13532.1	3005.62	1088.9	956.501	6581.67	1598.71	502.38	1150.77	341.519	722.635	841.424	327.908	590.234	3332.29	1086.43	4909.96	3206.07	4556.06	1129.74
s_5	FDX1-/-	1902.43	2156.41	388.154	109824	40049.4	6833.43	3123.2	604.993	10791.6	1533.45	41146.7	47998.1	15299.7	3375.98	1118.94	844.595	7390.5	1674.81	818.238	909.287	385.758	823.031	729.586	362.996	612.181	3780.91	1108.16	5631.83	3064.5	4659.05	1250.72
s_6	FDX1-/-	3115.47	1931.45	399.329	112691	35781.3	7487.13	2762.71	535.544	9562.95	1946.59	39428.8	47180.2	13566.7	2938.51	1118.82	932.545	7024.94	1468.09	1516.99	782.36	313.177	807.973	799.823	298.042	635.667	2982.75	1045.47	5263.46	3151.56	4468.3	1193.33
				LPC
	Total TAGs	s_1	Ctrl	472304
		s_2	Ctrl	423356
		s_3	Ctrl	416277
		Ctrl	Average	437312
			SD	30510
			SEM	17614.9
	Total TAGs	s_4	FDX1-/-	299192
		s_5	FDX1-/-	320192
		s_6	FDX1-/-	313131
		FDX1-/-	Average	310838
			SD	10686.4
			SEM	6169.78
			p-value	0.00247527

## Sheet: Figure 5F
	HCT116	LPE 16:0	LPE 18:0	LPE 18:0	LPE 18:2	LPE 20:4	LPE 20:4	LPE 22:6
s_1	Ctrl	44205.1	162944	8090.61	2290.34	9416.83	5933.56	4189.7
s_2	Ctrl	36408.9	138820	6658.33	2499.38	11469.7	5782.82	4650.79
s_3	Ctrl	36006.5	132946	6366.54	2195.95	10278	5055.87	3995.69
s_4	FDX1-/-	21020.8	133144	6220.35	1693.98	8493.43	4798.59	4116.79
s_5	FDX1-/-	20588.9	126424	6505.18	1672.42	7675.63	4950.16	3560.48
s_6	FDX1-/-	19379.7	125354	5716.35	1764.97	8737.51	4588.21	3050.27
				LPE
	Total TAGs	s_1	Ctrl	237070
		s_2	Ctrl	206290
		s_3	Ctrl	196844
		Ctrl	Average	213402
			SD	21034.7
			SEM	12144.4
	Total TAGs	s_4	FDX1-/-	179488
		s_5	FDX1-/-	171377
		s_6	FDX1-/-	168591
		FDX1-/-	Average	173152
			SD	5661.02
			SEM	3268.39
			p-value	0.0328897

## Sheet: Figure 5G
	HCT116	Cer 32:1;2O|Cer 18:1;2O/14:0	Cer 32:2;2O|Cer 18:2;2O/14:0	Cer 33:1;2O|Cer 17:1;2O/16:0	Cer 34:0;2O|Cer 18:0;2O/16:0	Cer 34:2;2O|Cer 18:2;2O/16:0	Cer 36:0;2O|Cer 18:0;2O/18:0	Cer 36:2;2O|Cer 18:2;2O/18:0	Cer 36:2;2O|Cer 18:2;2O/18:0	Cer 38:0;2O|Cer 18:0;2O/20:0	Cer 39:1;2O|Cer 18:1;2O/21:0	Cer 40:1;2O|Cer 18:0;2O/22:1	Cer 41:2;2O|Cer 17:1;2O/24:1	Cer 42:1;2O|Cer 18:0;2O/24:1	Cer 42:1;2O|Cer 18:1;2O/24:0	Cer 42:3;2O|Cer 18:2;2O/24:1	Cer 43:2;2O|Cer 19:1;2O/24:1	Cer 44:0;2O|Cer 18:0;2O/26:0	Cer 44:1;2O|Cer 18:1;2O/26:0	Cer 44:2;2O|Cer 18:1;2O/26:1	Cer 44:3;2O|Cer 18:2;2O/26:1	Cer d32:1	Cer d33:1	Cer d34:0	Cer d34:1	Cer d34:1	Cer d34:2	Cer d36:1	Cer d36:1	Cer d38:1	Cer d38:1	Cer d39:1	Cer d40:0	Cer d40:1	Cer d40:1	Cer d40:2	Cer d41:1	Cer d41:1	Cer d42:0	Cer d42:1	Cer d42:1	Cer d42:2 Isomer A	Cer d42:2 Isomer A	Cer d42:2 Isomer B	Cer d42:2 Isomer B	Cer d43:1	Cer d44:1
s_1	Ctrl	3052.31	81101.6	3373.31	181914	10858.6	26907.6	74249.5	1529.49	16906.5	915.248	14418.5	2732.41	97218.4	206780	17555.2	2412.52	41531.6	16031.3	11892.7	2844.6	802681	649621	1.1136e+07	8.7621e+06	202091	1.69353e+06	528978	14845	603052	13712.1	92192.3	1.81267e+06	1.33157e+06	41427.2	424288	616036	15059.4	5.7634e+06	6.28693e+06	264022	4.64161e+06	168339	1.93786e+06	60869.5	193839	1.55479e+06
s_2	Ctrl	2520.57	81415.7	2518.34	186196	9768.9	28858.3	66716	1327.21	19387.2	897.815	17351.8	2728.02	107925	216744	18547.4	2509.42	44780.3	15891.9	12002.8	2888.62	702627	553581	1.13898e+07	7.64984e+06	167734	1.42459e+06	555354	14738.7	605369	13176.1	93005.9	2.01687e+06	1.34896e+06	41105.4	426256	651130	15008.6	6.19295e+06	6.46449e+06	264976	4.743e+06	163155	2.03803e+06	63345.6	199924	1.59161e+06
s_3	Ctrl	2501.49	70648.4	2509.04	180731	8319.58	29527.7	61104.5	1358.17	19440.8	910.122	17642.1	2672.07	110753	213073	17244.8	2456.14	45831.1	17534.2	12177.1	2841.57	628536	482013	1.10177e+07	7.01303e+06	154094	1.2706e+06	536500	14292.1	593856	12819.4	91807.9	1.98684e+06	1.3238e+06	40684.5	413720	628480	16184.6	6.22981e+06	6.36618e+06	262590	4.47639e+06	160187	1.98262e+06	61649.7	199620	1.59934e+06
s_4	FDX1-/-	2034.27	38293.5	1659.34	35129.5	5334.38	5800.88	33389.7	696.65	4786.22	696.65	2645.54	1741.01	22149.3	163418	10285.2	1716.26	8034.36	9317.53	6576.72	1327.72	489100	352109	4.12786e+06	7.23898e+06	142608	757665	350594	9040.36	384108	8013.33	56193.5	708212	1.18167e+06	35626.9	225742	503830	13181.9	2.28281e+06	5.6143e+06	215679	3.83044e+06	124419	1.27683e+06	37986.6	179442	1.07181e+06
s_5	FDX1-/-	1981.5	40595.7	1660.44	37174.1	4952.56	5974.46	31961.6	869.753	4777.65	757.14	2512.22	1860.5	22865.2	170773	11015.7	1837.74	8120.09	9267.78	7059.85	1350.15	495141	352301	4.01645e+06	7.15307e+06	152449	781488	354149	9157.56	384402	8153.63	44679.7	716596	1.20525e+06	36324.8	231571	515030	13216.4	2.23026e+06	5.58234e+06	220075	3.9735e+06	129152	1.2823e+06	38598.6	175489	1.04483e+06
s_6	FDX1-/-	1890.7	41210.1	1503.02	33709	5036.44	5527.74	34057.1	794.002	4332.08	633.339	2287.7	1733.53	20283.1	174231	10136.9	1634.57	7561.64	8359.14	6632.59	1279.48	482975	357910	4.06344e+06	7.15992e+06	137528	761938	369089	8118.14	399973	7512.75	58697.9	730972	1.22656e+06	33803.3	233070	530121	12268.6	2.33396e+06	5.6982e+06	203998	3.95627e+06	120092	1.29925e+06	35266.7	182840	1.06662e+06
					CER
		Total TAGs	s_1	Ctrl	5.04257e+07
			s_2	Ctrl	5.02316e+07
			s_3	Ctrl	4.83826e+07
			Ctrl	Average	4.968e+07
				SD	1.12774e+06
				SEM	651100
		Total TAGs	s_4	FDX1-/-	3.15733e+07
			s_5	FDX1-/-	3.15133e+07
			s_6	FDX1-/-	3.18332e+07
			FDX1-/-	Average	3.16399e+07
				SD	170043
				SEM	98174.5
				p-value	1.05553e-05

## Sheet: Figure 5H
	HCT116	PE 30:0	PE 30:1|PE 14:0_16:1	PE 32:0|PE 16:0_16:0	PE 32:1|PE 16:0_16:1	PE 32:2|PE 16:1_16:1	PE 32:2|PE 16:1_16:1	PE 34:1	PE 34:1|PE 16:0_18:1	PE 34:2	PE 34:2|PE 16:1_18:1	PE 34:2|PE 16:1_18:1	PE 34:3|PE 16:1_18:2	PE 35:1|PE 18:0_17:1	PE 36:1	PE 36:1	PE 36:1|PE 18:0_18:1	PE 36:2	PE 36:2|PE 18:1_18:1	PE 36:2|PE 18:1_18:1	PE 36:3	PE 36:4	PE 36:4	PE 37:1|PE 19:0_18:1	PE 37:2|PE 18:1_19:1	PE 38:1|PE 20:0_18:1	PE 38:2	PE 38:2|PE 18:1_20:1	PE 38:3|PE 18:0_20:3	PE 38:4	PE 38:4 Isomer B	PE 38:5|PE 18:1_20:4	PE 38:6	PE 38:6	PE 40:2|PE 18:1_22:1	PE 40:4	PE 40:4|PE 18:0_22:4	PE 40:6	PE 40:6	PE 40:6|PE 18:0_22:6	PE 42:1	PE 42:1|PE 24:0_18:1	PE 42:2	PE 42:2|PE 18:1_24:1	PE 42:3|PE 24:1_18:2	PE 42:4|PE 22:0_20:4	PE 42:7	PE 44:1|PE 26:0_18:1	PE 44:2|PE 18:1_26:1
s_1	Ctrl	7087.61	14005.3	197086	516806	99531	21761.6	3.29229e+06	612705	432893	1.42042e+06	325593	75470.2	224474	78323.6	644846	3.20387e+06	817776	4.10402e+06	1.08109e+06	809327	883052	230414	35843.5	75787.8	162107	26784.3	318516	390274	1.14458e+06	4.57543e+06	2.6782e+06	441431	75037	180437	5720.3	428986	149848	11716.1	3.47924e+06	4018.65	499490	8432.72	182019	32641.2	111384	4976.1	133683	92708.8
s_2	Ctrl	7188.1	14368.4	191739	499223	105006	22603.8	3.39445e+06	665754	425455	1.41968e+06	365331	78768	226769	81352.1	646697	3.21295e+06	817060	4.2655e+06	1.1437e+06	797129	863685	245324	36199.2	77072.7	150785	29166.2	322149	394091	1.20042e+06	4.76352e+06	2.69005e+06	453117	76788.3	167813	5868.7	449843	149901	11401.7	3.50495e+06	3984.96	493149	7707.83	176290	32916.9	114840	4960.85	125865	92605.5
s_3	Ctrl	6829.7	13817	186536	486911	97773.9	22137.7	3.39537e+06	681642	419024	1.37864e+06	370958	76108	226005	80406	661012	3.22312e+06	832370	4.30653e+06	1.11148e+06	782419	838313	248412	34176.5	78157.2	147172	28302.3	324462	392407	1.22874e+06	4.75228e+06	2.64796e+06	422208	79150.4	167245	6322.27	436936	153546	11604.9	3.42195e+06	4223.49	484818	7931.99	175167	34370.9	113078	5041.84	132715	94437.9
s_4	FDX1-/-	11651.2	22693.7	258185	393988	50659.9	11642.6	2.48971e+06	404378	339872	849074	170289	54411.7	182750	72905.7	533373	2.75965e+06	830362	3.1966e+06	788560	661862	827767	238185	37652.5	81076.2	158581	25910.9	336893	400847	1.96988e+06	7.13753e+06	2.90358e+06	474048	59508.5	211710	5605.37	409107	138235	12699.3	3.04731e+06	3365.7	448092	7806.68	173546	41050.4	143580	4568.44	75443.6	59221.4
s_5	FDX1-/-	12982.8	23997.3	261985	392996	49861	11565.6	2.46202e+06	412561	340645	849546	202008	50910.5	187133	70104.9	569347	2.89591e+06	821062	3.15047e+06	800537	644529	826295	242372	39873.3	83051.8	168955	25068.3	352473	407311	1.99521e+06	7.01104e+06	2.85749e+06	472334	62212.5	223663	6200.88	418439	145401	13099	2.9919e+06	3840.81	464127	8722.69	190247	42673	140459	3354.42	78196.3	60163.9
s_6	FDX1-/-	12375.7	24722.3	280193	409710	51578.7	11381.5	2.58048e+06	435607	355326	872716	179262	53125.9	184589	71497.4	527696	3.00868e+06	864571	3.28606e+06	734879	674966	852402	225112	39292.6	82479.6	166992	26083.3	370396	412646	1.86595e+06	7.2067e+06	2.92842e+06	508995	56661.7	226162	5968.98	445951	132797	12733.1	3.19072e+06	3439.12	479456	8160.06	188958	42858.6	143994	3017.67	80102.2	62183.6
				PE
	Total TAGs	s_1	Ctrl	6.40229e+07
		s_2	Ctrl	6.55611e+07
		s_3	Ctrl	6.54817e+07
		Ctrl	Average	6.50219e+07
			SD	866087
			SEM	500036
	Total TAGs	s_4	FDX1-/-	6.60461e+07
		s_5	FDX1-/-	6.57828e+07
		s_6	FDX1-/-	6.72979e+07
		FDX1-/-	Average	6.63756e+07
			SD	809480
			SEM	467353
			p-value	0.119098
[truncated: 51 more columns]

## Sheet: Figure 5J
	HCT116	SM 39:2;2O|SM 18:1;2O/21:1	SM 43:2;2O	SM 58:3;3O|SM 40:1;2O(FA 18:1)	SM d30:1	SM d30:1	SM d32:0	SM d32:0	SM d32:1	SM d32:1	SM d32:2	SM d32:2	SM d33:1	SM d33:1	SM d34:0	SM d34:0	SM d34:1	SM d34:1	SM d34:2	SM d34:2	SM d36:0	SM d36:1	SM d36:2	SM d37:1	SM d38:0	SM d38:1	SM d38:1	SM d38:2	SM d39:1	SM d39:1	SM d40:0	SM d40:1	SM d40:1	SM d40:2 Isomer A	SM d40:2 Isomer A	SM d40:2 Isomer B	SM d40:2 Isomer B	SM d41:1	SM d41:1	SM d41:2	SM d41:2 Isomer A	SM d41:2 Isomer B	SM d42:0	SM d42:0	SM d42:1	SM d42:1	SM d42:2	SM d42:2 Isomer A	SM d42:2 Isomer B
s_1	Ctrl	1122.96	25126	1104.07	9591.22	1092.97	51400.5	30177.6	353895	110894	22194.8	3574.35	55851.2	82255.7	344250	879284	2.46722e+06	6.05799e+06	379174	198656	11100.7	83000.6	62244.6	43.9297	6437.83	62062.4	42846.7	10064.4	27.1353	5.63144	7970.65	210728	100978	31764.9	26642.1	17682.9	31145.1	89798.7	17655.2	8.47493	18639.3	197.134	105528	14817.2	757723	232763	447827	706733	179734
s_2	Ctrl	895.585	27310.3	1164.37	10416.9	1157.68	52260.7	33502.4	379576	119013	28431.2	3699.44	57239.3	89009.7	351656	915107	2.54786e+06	6.40658e+06	403770	216960	13422.6	90528.4	63473.9	44.1101	6410.74	28957.6	46706.5	9785.63	27.2467	5.65456	8555.45	230942	113628	23920.9	28520.4	9210.13	33601.7	97480.4	20167.9	9726.52	21480.6	160.023	116903	16275.6	846411	267372	497897	752224	196639
s_3	Ctrl	925.237	27001.4	1295.55	10648.3	1245.89	50324.5	33604.3	361790	121841	29509.3	3549.8	52831.4	90472.4	348897	910082	2.39245e+06	6.34109e+06	391557	223874	13259.9	91957.6	63484	42.6991	8047.51	15450.5	48605.7	11023	26.3752	5.47369	8062.63	221603	116103	18118.2	29867.8	9.34954	34401.1	95369.6	19627.5	17389.5	22068.6	502.543	114215	16181.4	825765	265144	515600	740269	194765
s_4	FDX1-/-	1612.32	23811.1	1283.17	8326.39	1023.32	36556.2	17330.9	346240	107801	21613.5	2729.68	47940.1	71747.5	248407	635197	2605175	6.46871e+06	366884	195113	4.96193	88303.4	67592.3	48.9387	5.69199	13.1906	34748.7	9165.33	5399.96	6.27356	4438.51	239336	107669	18241.6	28254.5	23578.4	31006.5	89018.9	16735.7	9.44127	20732.4	81.0242	43361.8	5401.2	618583	155781	497716	817422	156392
s_5	FDX1-/-	1566.99	24078.7	1257.91	9181.52	956.009	34384	18460.1	336403	110838	21671.9	3276.55	46686.3	73847.5	247057	641639	2.55144e+06	6.5575e+06	362997	202244	4.80401	91902.3	68339.1	47.3812	5.51083	12.7707	35929.8	9645.15	5521.61	6.07389	4754.89	244474	113232	18276.8	30673.8	8825.71	33733.5	85604.8	16951.8	9.14079	22360.8	1680.8	44722.8	5385.04	630035	161770	518032	826693	156883
s_6	FDX1-/-	1444.8	23551.1	1243.39	8860.92	869.676	35476.3	15947.6	344771	102238	22491.7	2872.14	44800.6	67856.9	255289	606637	2.5554e+06	6.15182e+06	373718	184041	4.66854	82621.2	62976.5	46.0451	2113.07	12.4106	33057.4	8675.81	5367.08	5.90262	4449.67	238761	101098	19589.3	27806.4	10053.1	29565.5	88870	16034.9	8.88304	20121.3	1590.33	43386	5133.07	627064	149528	474116	815007	162188
				SM
	Total TAGs	s_1	Ctrl	1.46192e+07
		s_2	Ctrl	1.54913e+07
		s_3	Ctrl	1.51923e+07
		Ctrl	Average	1.5101e+07
			SD	443200
			SEM	255882
	Total TAGs	s_4	FDX1-/-	1.45585e+07
		s_5	FDX1-/-	1.46607e+07
		s_6	FDX1-/-	1.41021e+07
		FDX1-/-	Average	1.44404e+07
			SD	297468
			SEM	171743
			p-value	0.0987144
[truncated: 8 more columns]

## Sheet: Figure 5K
	HCT116	FA 10:0 (capric acid)	FA 11:0 (undecylic acid)	FA 12:0 (lauric acid)	FA 14:0 (myristic acid)	FA 14:1 (physeteric acid)	FA 15:0 (pentadecylic acid)	FA 15:1	FA 16:0 (palmitic acid)	FA 16:1 (palmitoleic acid)	FA 16:2	FA 17:0 (margaric acid)	FA 17:1	FA 18:0 (stearic acid)	FA 18:1 (oleic acid)	FA 18:2 (linoleic acid)	FA 18:3 (linolenic acid)	FA 19:0	FA 19:1	FA 20:0 (arachidic acid)	FA 20:1 (eicosenoic acid)	FA 20:2 (eicosadienoic acid)	FA 20:3 (eicosatrienoic acid)	FA 20:3 (homo-gamma-linolenic acid)	FA 20:4 (arachidonic acid)	FA 20:5 (eicosapentaenoic acid)	FA 21:1	FA 22:0 (behenic acid)	FA 22:1 (erucic acid)	FA 22:2 (docosadienoic acid)	FA 22:3	FA 22:4	FA 22:5	FA 22:6 (docosahexaenoic acid)	FA 24:0 (lignoceric acid)	FA 24:1 (nervonic acid)	FA 24:2	FA 24:3	FA 24:4	FA 24:5	FA 26:0 (cerotic acid)	FA 26:1	FA 26:5	FA 28:0 (montanic acid)	FA 28:1	FA 28:7	FA 42:10	FA 8:0 (caprylic acid)	FA 9:0
s_1	Ctrl	40528.6	9149.14	176955	1.10774e+06	145845	95634.5	11781.6	7.33032e+06	4.16662e+06	31708.2	174851	445804	8.37384e+06	1.44647e+07	1.1879e+06	47758.4	54928.2	315989	337376	1.86427e+06	162793	289326	346661	2.90582e+06	289279	55130.3	144577	535573	82624.4	55344.7	428156	590973	900739	361173	685933	79114.5	21618.3	60104.2	46548.8	721180	653427	7845.14	104785	100011	59338.9	51812.6	6341.2	29163.5
s_2	Ctrl	35515.6	10382.3	134505	757950	97232.8	78737.8	8254.32	6.75379e+06	2.878e+06	24283.4	114750	321928	7.64264e+06	1.09929e+07	901273	36275.1	42192.9	220348	235279	1.26021e+06	121960	223083	273322	2.21362e+06	277925	38753.3	111411	315263	59477.8	40265.6	332054	468493	766548	268440	505240	63715.9	16648.1	43261.3	33814.7	516892	459447	4976.46	84140.3	79026.7	62395.4	51352.8	5195.06	31739.2
s_3	Ctrl	35314.5	7862.9	112112	689503	91566.1	67242.2	8743.87	6.02966e+06	2.66567e+06	23262.6	101831	295856	7.05608e+06	1.02478e+07	814245	36991.1	36930.7	199644	200515	1.17814e+06	117177	199639	257040	1.94929e+06	267582	35854.3	94775.8	267047	56901.5	38295.3	306212	455939	753499	241418	444854	57405.7	15975.2	40902.6	30762.8	459878	412594	5056.95	78828.7	67500.2	63175.2	49743.6	7044.54	32599.2
s_4	FDX1-/-	38440.7	10011.7	163332	861467	123647	74102.2	7617.36	7.43215e+06	2.68714e+06	33596.3	126699	386363	8.76004e+06	1.3067e+07	1.45666e+06	53429.2	54090	310659	259516	1.74399e+06	218565	362257	396267	4.5019e+06	413470	48847.1	136359	368692	99179.1	112748	772779	911315	1.05721e+06	266486	607061	90001.4	47179.1	138002	70721.7	309372	359844	10913.8	45637.4	42359.5	82269	61833.5	6532.17	32580.4
s_5	FDX1-/-	38176.9	10798.8	165428	895972	123062	74032	7465.98	8.05753e+06	2.81882e+06	33805.3	131778	389502	9.09055e+06	1.30904e+07	1.52039e+06	53438.3	57174.9	302807	276799	1.75533e+06	222711	367300	425813	4.77975e+06	419662	51383.7	143241	368207	98102.4	110901	771054	880196	1.06604e+06	274107	604279	94609	44731.2	135392	67236.9	326017	364071	10324.4	48175.4	43766.8	82867.3	63030.7	5567.14	27948.3
s_6	FDX1-/-	41390.5	10975.2	159955	975982	135587	88319.3	12303.5	8.4083e+06	3.12767e+06	37998	145990	425188	9.42326e+06	1.35705e+07	1.67598e+06	58685.1	60712	332198	302494	1.92264e+06	241983	394079	448222	5.24151e+06	461236	56629.1	155827	397297	107109	119730	839871	966404	1.18262e+06	288955	631985	98224.5	51893	143483	73728.1	340376	366655	11521.2	51109.5	43260.3	84484.4	61866.9	6327.57	35071.1
				FAs
	Total TAGs	s_1	Ctrl	5.01591e+07
		s_2	Ctrl	4.00149e+07
		s_3	Ctrl	3.6706e+07
		Ctrl	Average	4.22933e+07
			SD	7.00998e+06
			SEM	4.04721e+06
	Total TAGs	s_4	FDX1-/-	4.92203e+07
		s_5	FDX1-/-	5.07897e+07
		s_6	FDX1-/-	5.38176e+07
		FDX1-/-	Average	5.12759e+07
			SD	2.33686e+06
			SEM	1.34919e+06
			p-value	0.103008

[truncated: 1 more sheets: Figure 5L]
