# Supplementary material for: Ferredoxin 1 is essential for embryonic development and lipid homeostasis
Source: eLife journal article supplement (doi:10.7554/elife.91656), 2024-01-22

**B**

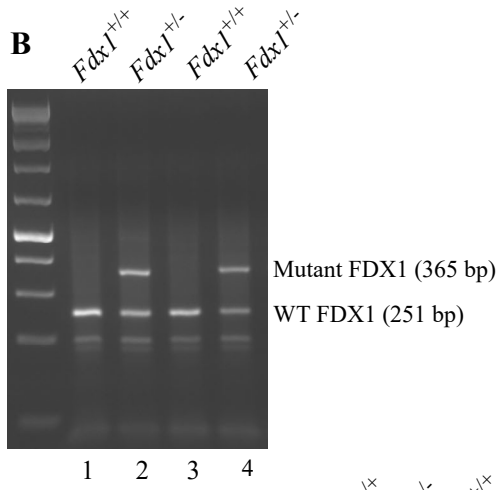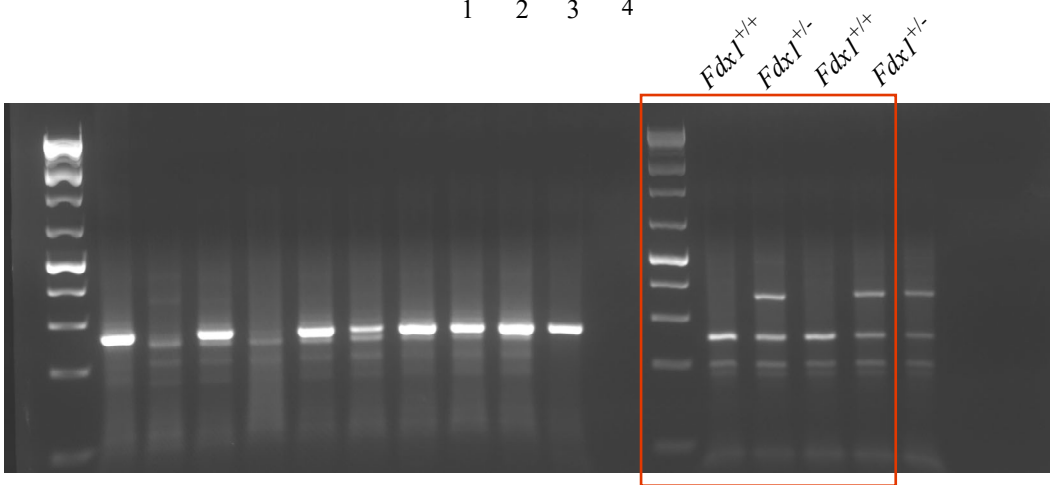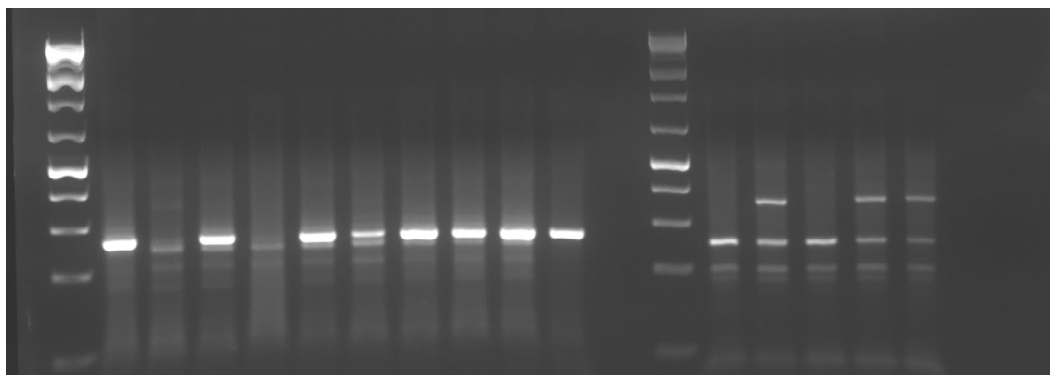

**E**

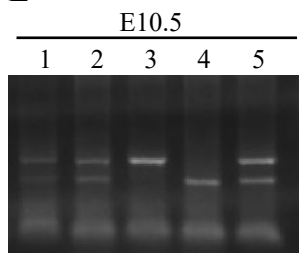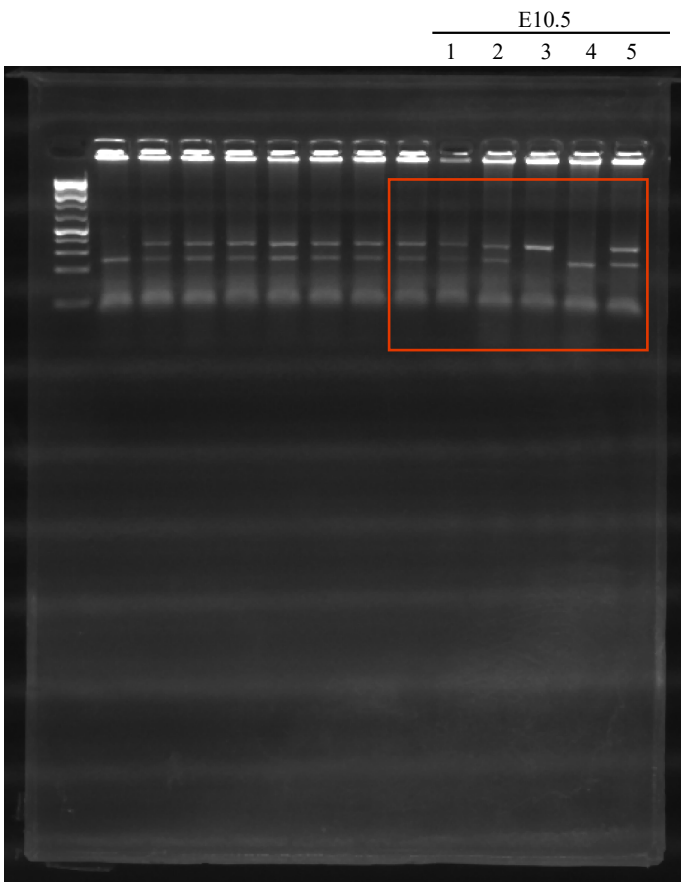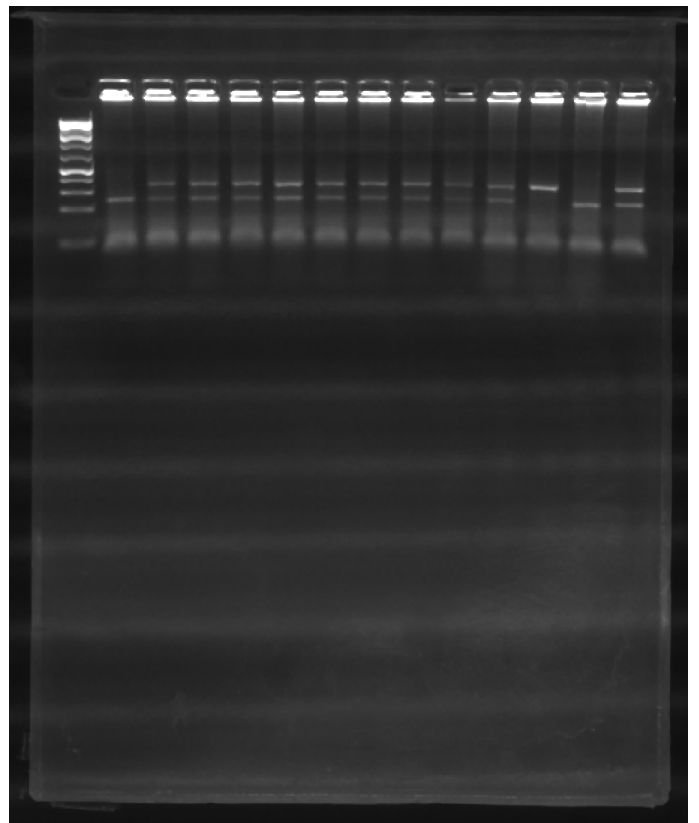

Supplement: supp [file elife-91656-supp-v1.zip]
