# Supplementary material for: Ferredoxin 1 is essential for embryonic development and lipid homeostasis
Source: eLife journal article supplement (doi:10.7554/elife.91656), 2024-01-22

**A**

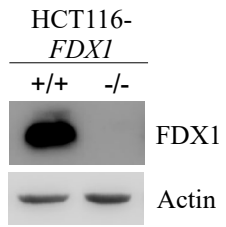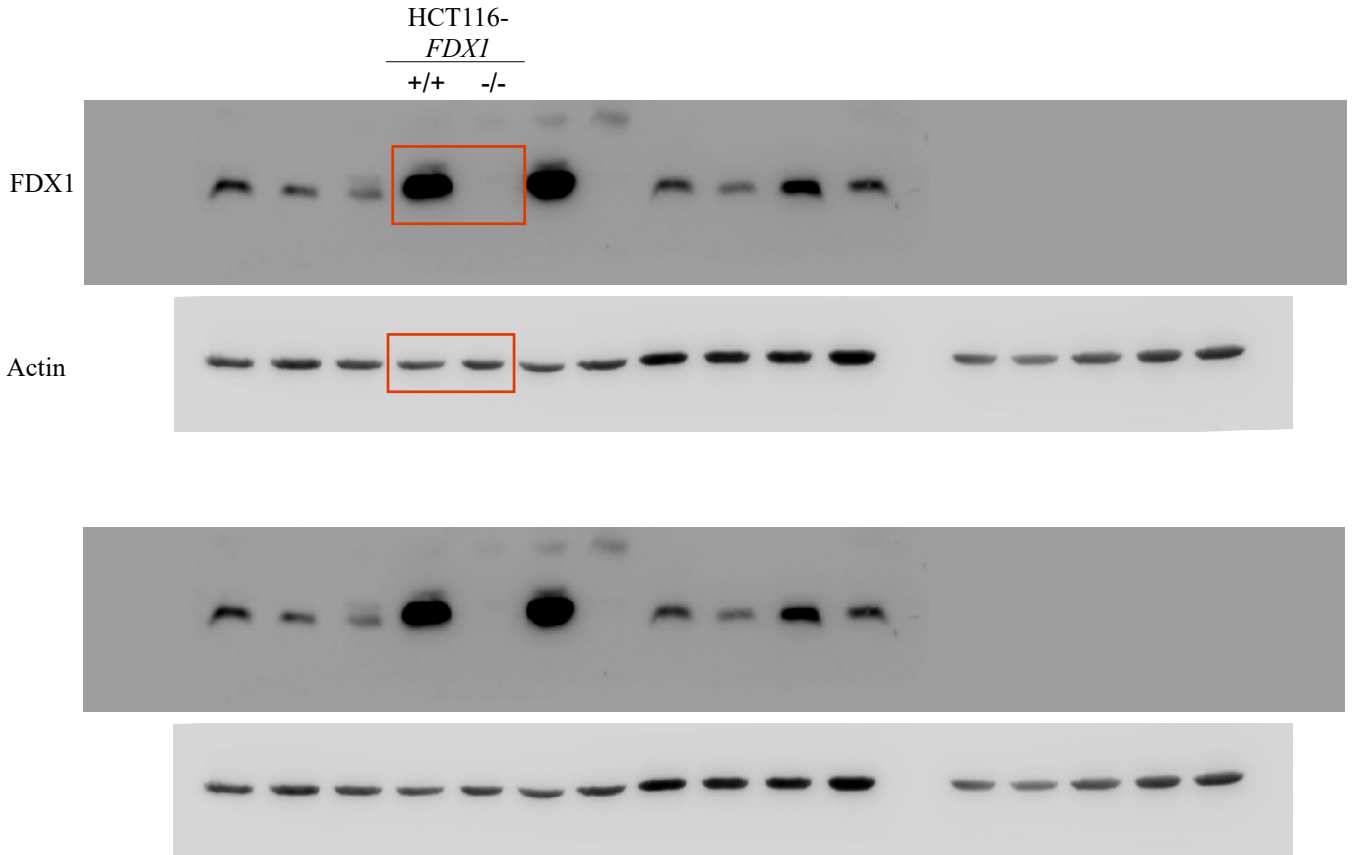

**B**HCT116-FDX1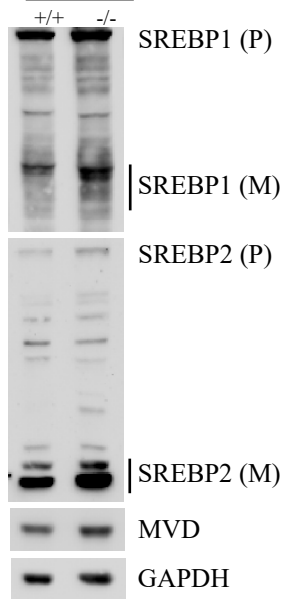HCT116-FDX1 $+/+$   $-/-$ 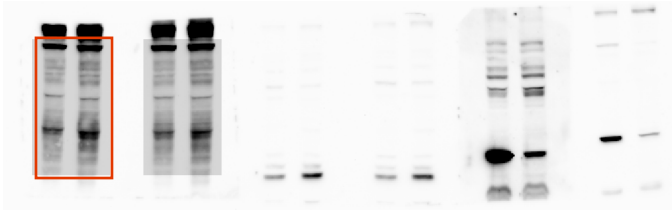

SREBP1

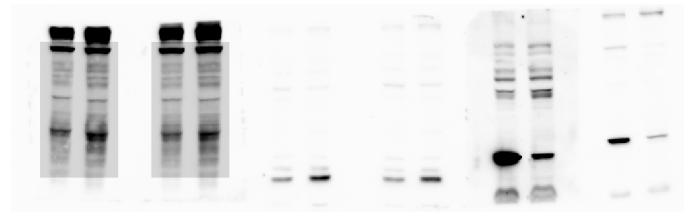HCT116-FDX1 $+/+$   $-/-$ 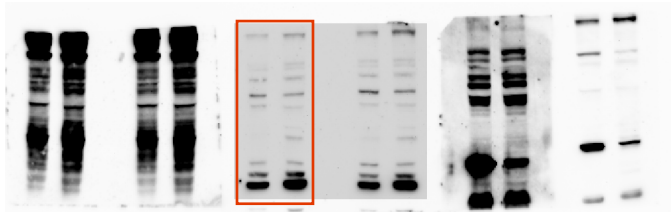

SREBP2

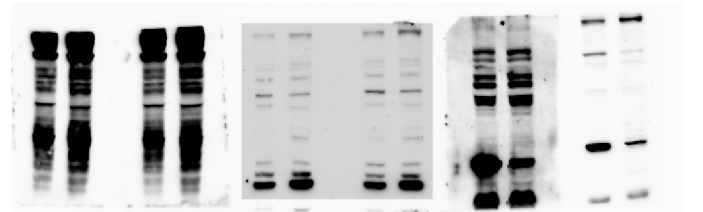

MVD

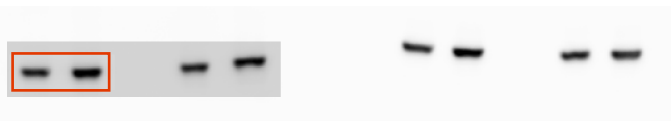

GAPDH

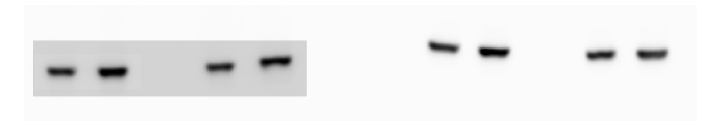

Supplement: supp [file elife-91656-supp-v1.zip]
