# Supplementary material for: Ferredoxin 1 is essential for embryonic development and lipid homeostasis
Source: eLife journal article supplement (doi:10.7554/elife.91656), 2024-01-22
Supplement: supp [file elife_poa_e91656_Figure_2_source_data_3.xlsx]

## Sheet: WT mice
Supplemental Table S1: Wild type (WT) mice (n=56) - survival time, tumor spectrum, steatosis, inflammation, and other abnormalities
ID	Gender	Survival (Wks)	Tumor	Inflammation	Other abnormalities
5	F	134	No	No	No
7	F	117	No	No	No
16	F	100	No	No	No
22	F	109	No	No	No
25	F	109	No	No	No
44	F	90	No	No	No
55	F	104	T-LBL	No	No
64	F	120	No	No	No
2	M	127	No	No	No
3	M	117	No	No	No
12	M	127	No	Liver	No
13	M	127	No	No	No
20	M	122	No	No	No
23	M	122	No	No	No
26	M	127	No	Liver/Salivary gland	No
34	M	124	DLBCL	No	No
37	M	134	No	No	No
62	M	128	No	No	No
45	M	133	No	No	No
49	M	117	No	No	No
50	M	113	T-LBL/ DLBCL	No	No
56	M	117	DLBCL	No	No
59	M	119	DLBCL	No	No
65	M	106	No	No	No
69	M	102	DLBCL	No	Spleen hyperplasia
70	M	103	No	No	Thymus hyperplasia
71	M	90	No	No	No
1-24-2	M	83	No	No	No
2-15-2	F	140	Lymphoma	No	EMH in liver
2-19-6	M	132	No	Pancreas	EMH in Spleen
2-19-2	F	143	No	No	EMH in Spleen
3-11-3	M	129	No	No	No
3-28-5	F	85	No	No	EMH in spleen
3-9-7	M	129	No	No	No
5-12-3	F	99	Lymphoma	No	EMH in Spleen
7-9-9	F	116	No	No	No
8-2-6	M	120	No	No	No
10-24-7	F	130	No	Pancreas	EMH in spleen
10-26-6	F	129	Histiocytic sarcoma	No	EMH in spleen/liver
11-10-7	M	121	No	No	No
11-7-3	F	121	No	No	No
11-29-2	F	144	No	No	EMH in spleen
12-2-4	F	113	No	No	No
12-20-7	F	115	No	No	EMH in Spleen
11-9-6	F	96	DLBCL	Skin	No
1-19-1	F	86	No	Skin	No
11-10-15	F	105	No	Skin/Pancreas	No
12-25-6	M	111	No	No	Hepatocirrhosis
1-19-5	F	109	Lymphoma	No	No
7-22-4	M	86	No	No	No
7-22-7	M	126	No	Kidney	No
11	M	111	N/A		Found dead
42	M	111	N/A		Found dead
43	M	107	N/A		Found dead
46	M	117	N/A		Found dead
52	M	101	N/A		Found dead
These mice were from published studies (Yang et al, 2017, PNAS, 114 (43) 11500-11505; Zhang et al, 2017, Genes & Dev, 31:1243-56)
T-LBL: Thymic lymphoblastic lymphoma; DLBCL: Diffuse large B-cell lymphoma; N/A: not applicable; EMH: extramedullary hematopoiesis

## Sheet: Fdxr-het mice
Supplemental Table S2: Fdxr+/- mice - survival time, tumor spectrum and other abnormalities (n=31)
ID	Gender	Survival (Wks)	Tumor	Other abnormalities
1	M	123	DLBCL in thymus, salivary, lung, liver, pancreas, and spleen	Liver steatosis and hepatitis
6	M	119	Not applicable	Found dead
14	M	100	Hepatocellular carcinoma; Spleen angiosarcoma	Liver steatosis
17	M	115	Lung adenocarcinoma	Liver steatosis; Thymus hyperplasia
18	M	98	Not applicable	Found dead
24	M	116	Lung carcinoma	Liver necrosis and hepatitis
27	M	115	T-LBL in thymus	Liver hepatitis; Lung chronic inflammation
21	M	114	Liver hemangioma; DLBCL in adrenal gland and spleen	EMH in spleen
33	M	112	T-LBL in thymus, kidney and spleen	No
31	M	102	T-LBL in thymus, salivary, kidney, pancreas and intestine	No
36	M	125	Liver angiosarcoma	Mildly enlarged spleen
38	M	104	No	Liver steatosis; large cell dysplasia in liver and spleen
57	M	106	No	Liver steatosis; Kidney inflammation
60	M	115	Liver hemangioma; Lung adenocarcinoma	Liver steatosis and chronic hepatitis
15	F	102	T-LBL in Thymus; Spleen angiosarcoma	Large cell hyperplasia in liver
32	F	92	Fibrosarcoma and lymphoma on left shoulder; lymphoma in salivary gland, spleen and lung	Liver chronic hepatitis
63	F	86	DLBCL in liver, thymus, spleen and pancreas	Liver steatosis and hepatitis; Lymphocytic sialadenitis; Endometrial polyp
73	F	68	DLBCL in spleen and in kidney	Lymphocytic sialadenitis; Spleen hyperplasia
40	F	100	DLBCL in spleen	Liver steatosis
41	F	39	Myeloid sarcoma in spleen; DLBCL in liver, spleen, kidney and intestine; Ovarian adenoma	Liver chronic hepatitis
47	F	60	No	Liver steatosis
48	F	100	High grade sarcoma in liver, ovary, uterus, and abdomen; DLBCL in spleen	Hepatitis; Liver steatosis
35	F	77	T-LBL in thymus	Large cell hyperplasia
51	F	113	Thymus adenoma; DLBCL in salivary gland	Liver steatosis and hepatitis
53	F	90	DLBCL in liver, thymus, lung, pancreas and ovary	Liver steatosis
54	F	102	Lung adenocarcinoma	Liver steatosis
58	F	97	Hepatocellular carcinoma; Spleen myeloid sarcoma, lymphoma and hemangioma	Liver steatosis; Intestine appendiceal epiploica
29	F	108	Salivary gland and kidney plasmacytoma	Thymus hyperplasia
61	F	100	DLBCL in kidney	Thymus, spleen hyperplasia
4	F	114	DLBCL in thymus, kidney, ovary, pancreas, shoulder, and abdominal lymph nodes.	Liver steatosis with inflammation; pancreas islet cell hyperplasia
19	F	116	DLBCL in liver, pancreas, spleen, kidney, and ovary	Hepatitis and Pneumonia
T-LBL: T-cell lymphoblastic lymphoma; DLBCL: Diffuse large B-cell lymphoma; EMH: extramedullary hematopoiesis
FDXR+/- mice were from published studies (Zhang et al, 2017, Genes & Dev, 31:1243-56; Zhang et al, 2019, Oncogene, 38:6256-69)

## Sheet: Fdx1-het mice
Supplemental Table S3: Fdx1+/- mice (n=26) - survival time, tumor spectrum, steatosis, inflammation, and other abnormalities
ID	Gender	Survival (Wks)	Tumor	Inflammation	Steotosis/Steatohepatitis
5-2-6	F	16	-	-	No
8-10-7	M	66	-	-	Yes
11-8-19	M	8	-	-	Yes
11-8-6	M	19	DLBCL in liver, spleen, adrenal gland, lung, and lymph nodes; Pleomorphic high grade sarcoma	-	No
5-4-47	M	92	-	-	No
5-20-1	F	48	Poorly differentiated adenocarcinoma associated with GI tract	Salivary gland/Pancreas	No
6-28-5	F	60	-	Salivary gland	No
7-10-2	F	64	DLBCL in Lymph Node	Salivary gland/Lung	No
52	M	94	-	Salivary gland/Lung	Yes
10-21-34	F	104	-	Kidney/Lung/Salivary gland/Pancreas/Abdominal fat	Yes
3	M	119	DLBCL in Spleen and Lymph Node	Liver/Kidney/Lung/Salivary gland/Pancreas/Brown fat	No
33	M	110	DLBCL in Spleen and Lymph Node	Liver/Lung/Salivary gland	No
10-21-23	F	104	-	Kidney/Lung/Pancreas/Salivary gland/Abdominal fat	Yes
10-21-20	F	104	Well-differentiated lung adenocarcinoma	Kidney/Lung/Pancreas/Salivary gland/Abdominal fat	Yes
5-4-45	M	89	-	Kidney/Salivary gland	Yes
6-28-5	M	60	-	Salivary gland	No
9-11-69	M	51	-	Salivary gland	No
5-4-49	F	73	-	Salivary gland	No
9-11-67	F	73	-	Lung/Salivary gland	Yes
3-12-21	M	79	-	Liver/Lung/Salivary gland	No
7-18-20	F	70	LBCL in spleen; pleomorphic high grade sarcoma	Pancreas/Salivary gland	Yes
5-29-4	F	79	DLBCL in spleen, lymph node; rhabdomyosarcoma	Kidney/Salivary gland/Abdominal fat/Brown fat	No
8-10-2	F	71	Rhabdomyosarcoma; intravascular metastatic rhabdomyosarcoma in lung	Kidney/Salivary gland/Pancreas/Brown fat	No
7-24-5	M	78	DLBCL in liver, spleen, lymph nodes, abdominal fat and brown fat	Liver/Lung/Salivary gland	No
8-10-3	M	75	-	Kidney/Salivary gland/Abdominal fat/Brown fat	Yes
7-24-14	M	78	Papillary adenocarcinoma in lung	Kidney/Salivary gland/Abdominal fat/Brown fat	Yes
T-LBL: T-cell lymphoblastic lymphoma; DLBCL: Diffuse large B-cell lymphoma; EMH: extramedullary hematopoiesis
FDXR+/- mice were from published studies (Zhang et al, 2017, Genes & Dev, 31:1243-56; Zhang et al, 2019, Oncogene, 38:6256-69)
